# Supplementary material
Source: PubMed Central journal article supplement (PMC7365640)
Supplement: mmc1.pdf [file mmc1.pdf]

# THE LANCET

## Global Health

### Supplementary appendix

This appendix formed part of the original submission and has been peer reviewed. We post it as supplied by the authors.

Supplement to: Acharya R, Porwal A. A vulnerability index for the management of and response to the COVID-19 epidemic in India: an ecological study. *Lancet Glob Health* 2020; published online July 16. [http://dx.doi.org/10.1016/S2214-109X\(20\)30300-4](http://dx.doi.org/10.1016/S2214-109X(20)30300-4).

## Appendix A: Choice of indicators

### 1. Socioeconomic vulnerability

**Aim of this domain and rationale:** The aim of this domain is to capture social and economic deprivation in the population concerned. The relationship between poverty and disasters is well established;<sup>1</sup> poor are less likely to have resources to prepare for or mitigate or recover after an epidemic. Similarly, presence of socially marginalised groups in a population often make the community more vulnerable than others at different stages of a disaster. As for example, in the context of an epidemic, a socially marginalised group likely lack enough information about the epidemic or may have less education to understand the information provided to them, lack concept of social distancing essential for protecting themselves from infection or even if they have the concept, may not actually have options to exercise it<sup>2</sup>. Also, since they are most likely to engage in menial jobs,<sup>3</sup> they have high risks of losing their income in time of the epidemic because of cessation of most economic activities in the country, and this make them economically vulnerable. There is also a relationship between level of education and disaster as compared to others, persons with higher levels of education are more likely to have access to and act upon information available during different phases of epidemic<sup>4</sup>.

**Indicators used:** We used three indicators to capture the domain – 1) percent of population belonging to scheduled caste and scheduled tribe -two most backward groups in the country 2) percent of population aged 15 or above who have completed secondary or higher level or education and 3) an asset deprivation index. We used percent of population belonging to scheduled castes and scheduled tribe to represent marginalised population as there is evidence that these groups are the most backward groups in the country (in terms of most of the social and development indicators).<sup>5</sup> We considered secondary or higher education level to represent overall education level of the population, it has been found to have strong relationship with most of the social and development outcomes. Finally, we calculated an asset index as proportion of households that do not have any of the following – a motorized vehicle (a two-wheeler, car or truck, or tractor), television, computer, bicycle, refrigerator, thresher, air-conditioner/cooler). It is found that an asset index is more closely related to poverty indices compared to usual wealth index available in the Demographic and Health Surveys.<sup>6</sup>

**Source of data:** National Family Health Survey 2015-16, since this is the most recent data available in the country on the above indicators.

### 2. Demographic vulnerability

**Aim of this domain and rationale:** Several demographic characteristics of a population enhance risk of a pandemic spread and its subsequent consequences and these characteristics include elderly population, high urbanization and high population density.<sup>7,8</sup> The aim of this domain is to capture vulnerability due to such demographic characteristics of the population. Persons in older age group (age 60 years or above) are dependent on other people in the household for support even during normal times and more so during the time of a disaster such as COVID-19 epidemic. According to the trend so far, elders are particularly vulnerable to COVID-19 because of their reduced immunity resulting in high case fatality.<sup>2,9</sup> Given that COVID-19 came to the country through air route and started spreading through major transportation hubs, a district with high urban population and high population density might be at higher risk of both virus introduction through transportation links and its spread because of difficulty in practicing social/physical distancing.

**Indicators used:** We captured elderly population by the indicator: proportion of population aged 60 years or older. Urbanization and population density were indicated by percent urban population and number of persons living per square kilometre, respectively.

**Source of data:** National Family Health Survey 2015-16 for first two indicators, since this is the most recent data available in the country on the above indicators. In order to get population density at the district level, Census 2011 data were used. We obtained area of a district from Census 2011 and population as on December 2019 by projecting 2011 population linearly, based on growth rate calculated from 2001 and 2011 census data.

### 3. Vulnerability due to *housing and hygiene condition*

**Aim of the domain and rationale:** It is now well known that housing condition, particularly intra-household crowding, use of shared toilet facility, and poor hand and respiratory hygiene are crucial factors that determine spread of the virus and pace of spread.<sup>10,11</sup> The aim of the domain is to capture vulnerability of a population to spread of infection by evaluating these factors.

**Indicators used:** We considered three variables to represent this domain – 1) number of members per room available for sleeping (to capture intra-household crowding), 2) percent of households having own toilet facility, and 3) availability of soap and water for handwashing (the latter two indicators capture hygiene). We do not have any data on respiratory hygiene and hence it could not be captured.

**Source of data:** National Family Health Survey 2015-16, since this is the most recent data available in the country on the above indicators at district level.

#### 4. Vulnerability due to non-availability of healthcare

**Aim of the domain and rationale:** During a disaster such as COVID-19 epidemic It is important to have a capable and responsive health care system as these would be the local first responder if the epidemics breaks out in a community. Also important is the ability of people to access health care. The aim of this domain is to capture the health security (insurance), access to public healthcare and capacity of health system.

**Indicators used:** There is not much data available in India at the district level that can represent the strength of its health care system. With the available data from different sources, we have three variables to represent the domain – percent of households with health insurance, percent of households who reported no nearby public health facility and number of public hospitals per 100,000 population (only at district level) and number of hospital beds per 1000 population (only at state/UT level) – to capture health security, accessibility of affordable health care and health care system capacity.

**Source of data:** We used National Family Health Survey 2015-16 for first two indicators. For district level data on capacity of health facility we used Rural health statistics 2018 for numerator and linearly projected population as on December 2019 using growth rate calculated for each district based on 2001 and 2011 census for denominator. In case of state level healthcare capacity, we used data available in national health profile, 2019.

#### 5. Epidemiological vulnerability

**Aim of the domain and rationale:** It is now well known that people with co-morbidities such as diabetes, heart disease or respiratory issues have higher fatality in case of COVID-19 infection<sup>12</sup>. India is often called the diabetes capital of the world<sup>13</sup>. In addition, many people in India also suffer from other chronic ailments such as cardiovascular diseases, asthma, and cancer. As per a systematic review, tobacco use increases risk of suffering from COVID-19<sup>14</sup>. The aim of this domain is to capture the vulnerability of the population because of the epidemiological factors related to COVID-19, such as prevalence of co-morbidities, smoking etc.

**Indicators used:** Data on these epidemiological factors are not available in India for general population or for older population at the district level. We thus captured through three variables extracted from National Family Health Survey 2015-16 – proportions of males (aged 40-54) and females (aged 40-49) who reported suffering from any of these conditions - cardiovascular disease, diabetes, asthma, or cancer - and proportion of males who smoke tobacco. We understand that there are two limitations of these indicators – first, there will be a substantial proportion of men and women above age 54 and 49, respectively, who may be suffering from these ailments and are not captured here and second, these health conditions are self-reported and may not accurately reflect the actual situation. However, given no other data are available, we consider that these indicators best reflect the epidemiological vulnerability prevailing in each district or state. Finally, these variables are calculated from separate male and female datafiles as there are no such data available at the household level (male and female combined). Because of this reason, it was not possible to combine male and female health condition variables into one.

**Source of data:** National Family Health Survey 2015-16, since this is the most recent data available in the country on the above indicators at district level.

## References

1. Rentschler JE. Why Resilience Matters — The Poverty Impacts of Disasters. The World Bank. November 2013.
2. The Lancet. 2020. Redefining vulnerability in the era of COVID-19. [editorial] *The Lancet* 395(10230): P1089. [https://doi.org/10.1016/S0140-6736\(20\)30757-1](https://doi.org/10.1016/S0140-6736(20)30757-1)
3. Government of India, Ministry of social justice and empowerment. *Handbook on Social Welfare Statistics*. Tables 4.6 and 4.9, page 331. New Delhi. 2018.
4. UDISDR and Centre for Research on the Epidemiology of Disasters (CRED). *Economic Losses, Poverty and Disasters 1998-2017*. Belgium. 2017.
5. International Institute for Population Sciences (IIPS) and ICF. 2017. National Family Health Survey (NFHS-4), 2015-16: India. Mumbai: IIPS.
6. Wittenberg M, Leibbrandt M. Measuring inequality by asset indices: A general approach with application to South Africa. December 2017. The review of income and wealth. Series 63(4):706-730. Doi: 10.1111/roiw.12286.
7. Kaneda T, Greenbaum C. How demographic changes make us more vulnerable to pandemics like coronavirus. Population Reference Bureau. April 13, 2020. <https://www.prb.org/how-demographic-changes-make-us-more-vulnerable-to-pandemics-like-the-coronavirus/> [Accessed on May 27, 2020 at 08:30 AM IST].
8. Bhardwaj G, Esch T, Lall SV, Marconcini M, Soppelsa ME, Wahba S. Cities, Crowding, and the Coronavirus : Predicting Contagion Risk Hotspots. 2020. World Bank, Washington, DC. <https://openknowledge.worldbank.org/handle/10986/33648> [Accessed on May 27, 2020 at 08:30 AM IST].
9. Lloyd-Sherlock P, Ebrahim S, Geffen L, Mckee M. Bearing the brunt of covid-19: older people in low- and middle-income countries. 2020. *BMJ* 368: m1052.
10. Wall T. Cramped living conditions may be accelerating UK spread of coronavirus. The Observer. The Guardian. <https://www.theguardian.com/world/2020/apr/12/virus-hitting-hardest-modern-equivalent-victorian-slums>. [Accessed on May 27, 2020 at 10:55 AM IST]
11. World Health Organization. Coronavirus disease (COVID-19) advice for the public. <https://www.who.int/emergencies/diseases/novel-coronavirus-2019/advice-for-public>. [Accessed on May 27, 2020 10:49 AM IST].
12. Wang B, Li R, Lu Z, Huang Y. Does comorbidity increase the risk of patients with COVID-19: evidence from meta-analysis. *Aging (Albany NY)*. 2020;12(7):6049-6057. doi:10.18632/aging.103000
13. World Health Organization. *Diabetes country profiles, 2016*. Geneva.
14. Vardavas CI, Nikitara K. COVID-19 and smoking: A systematic review of the evidence. *Tob. Induc. Dis.* 2020;18(March):20
15. Tierney KJ. Social inequality, hazards, and disasters. In (eds.) Daniels RJ, Kettl DF, Kunreuther H. *On Risk and Disaster: Lessons from Hurricane Katrina*. Doi: <https://doi.org/10.9783/9780812205473>.

## Appendix B: Domain specific vulnerability maps

Appendix figure 1: State map for socio-economic vulnerability and number of confirmed COVID-19 cases as of June 17, 2020.

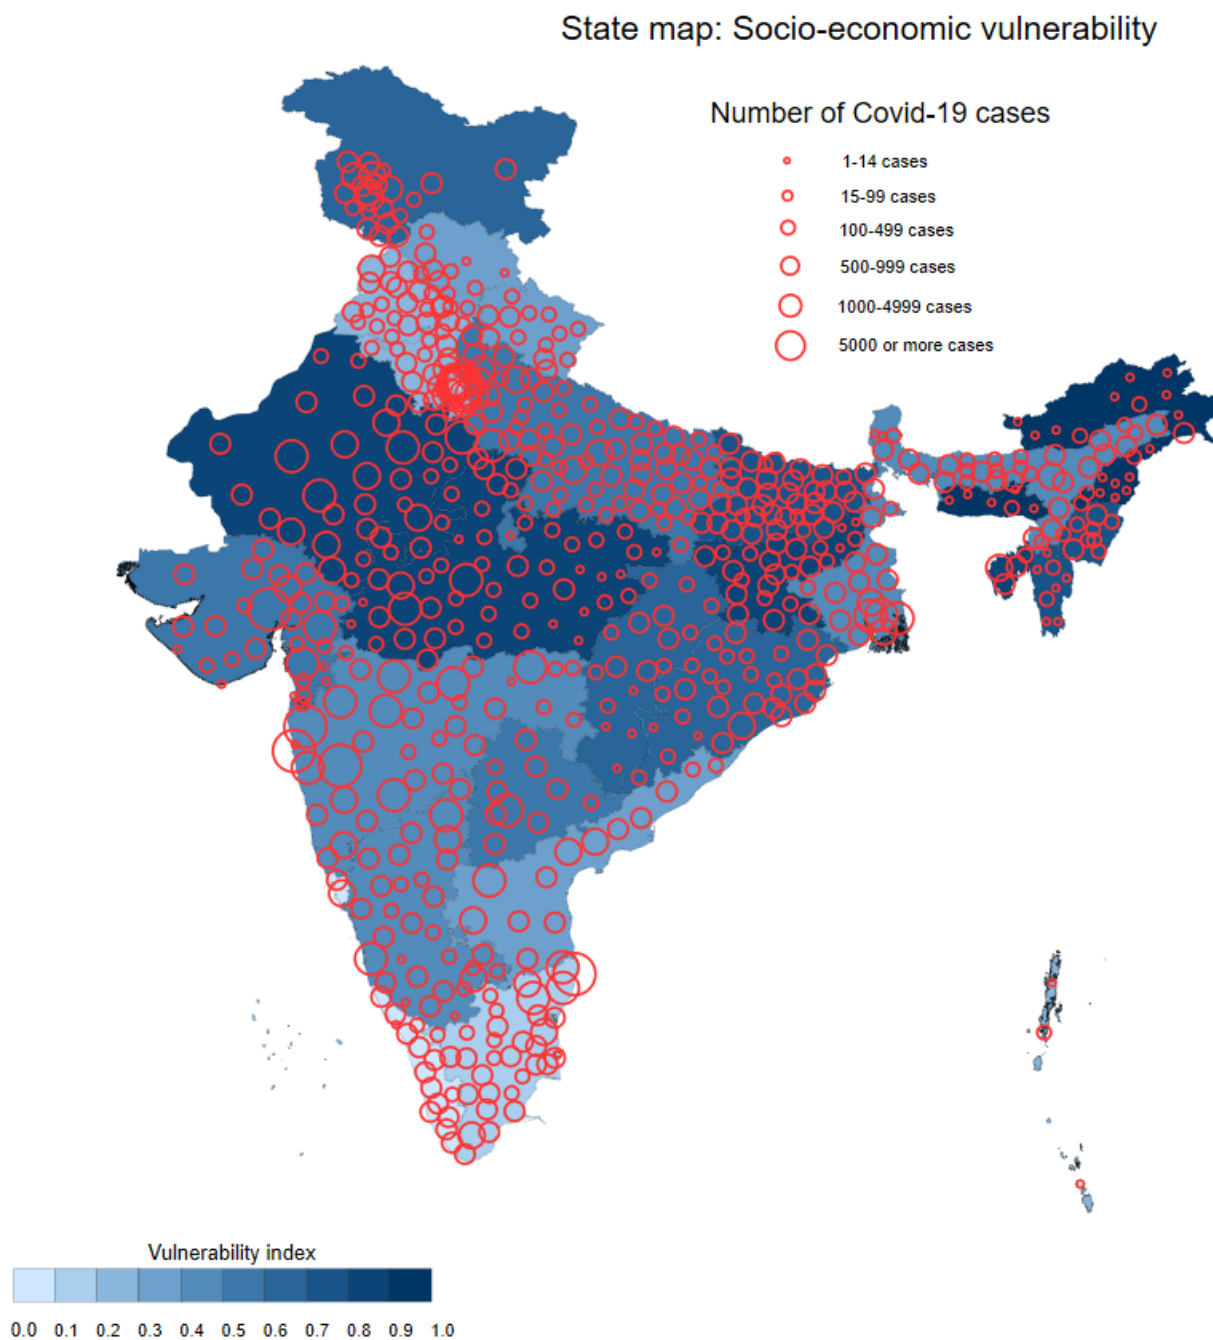

Note: This map does not reflect changes made in Jammu & Kashmir state (now union territory) in August 2019.

Appendix figure 2: State map for demographic vulnerability and number of confirmed COVID-19 cases as of June 17, 2020

### State map: Demographic vulnerability

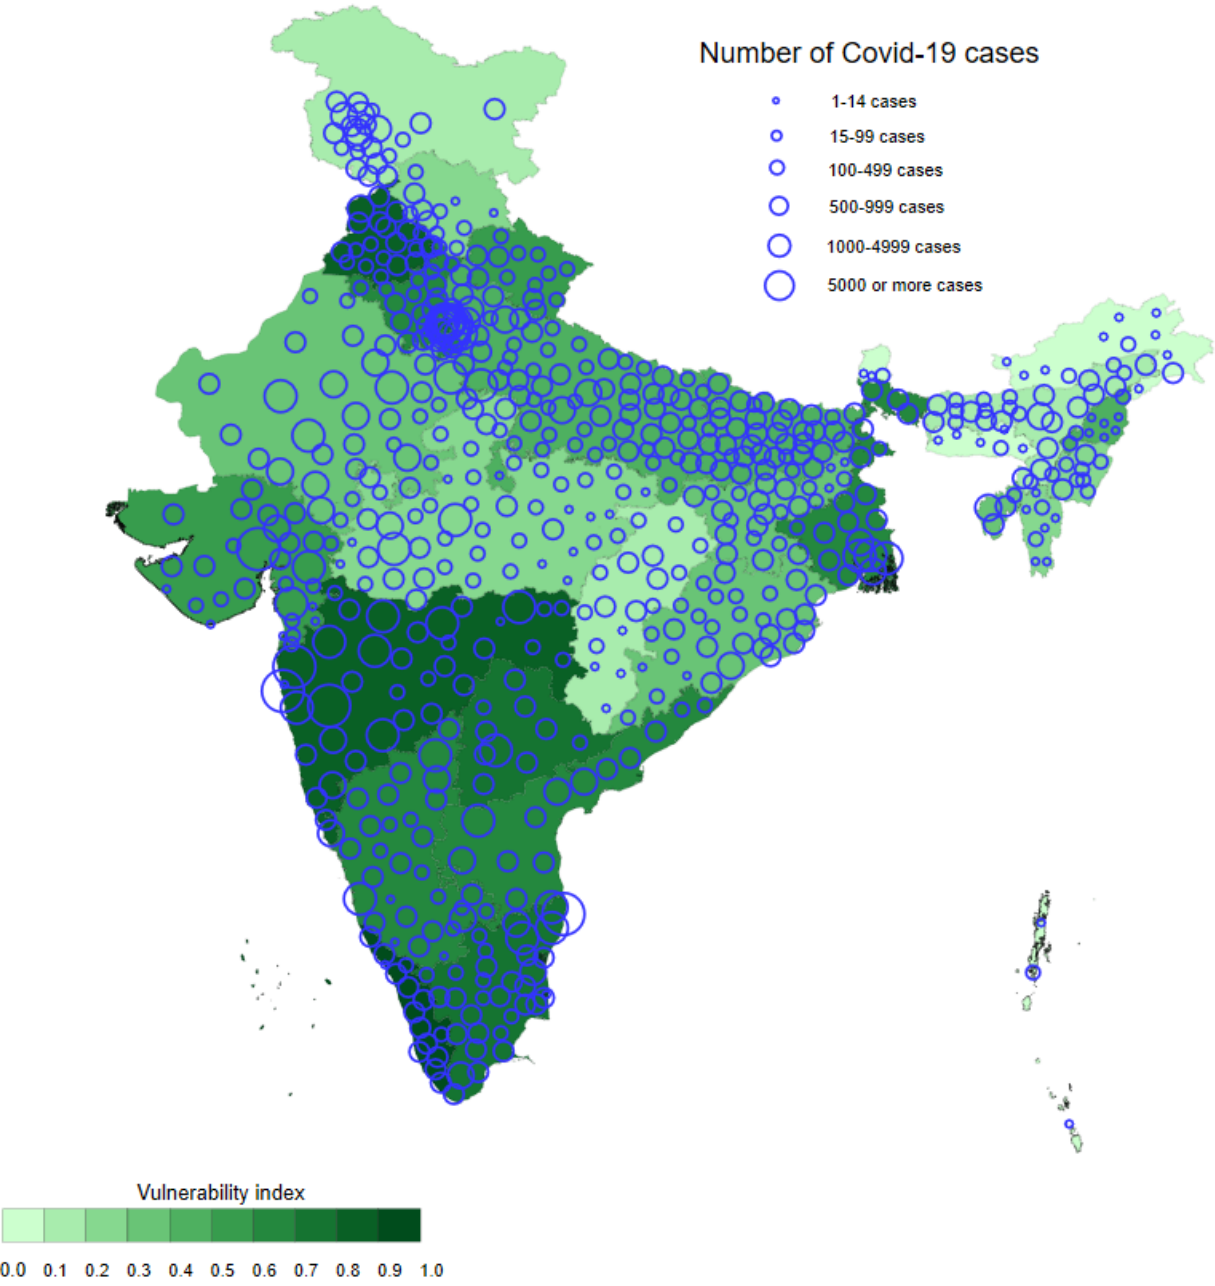

Note: This map does not reflect changes made in Jammu & Kashmir state (now union territory) in August 2019.

Appendix figure 3: State map for vulnerability due to poor housing and hygiene condition and number of confirmed COVID-19 cases as of June 17, 2020

### State map: Vulnerability due to housing and hygiene condition

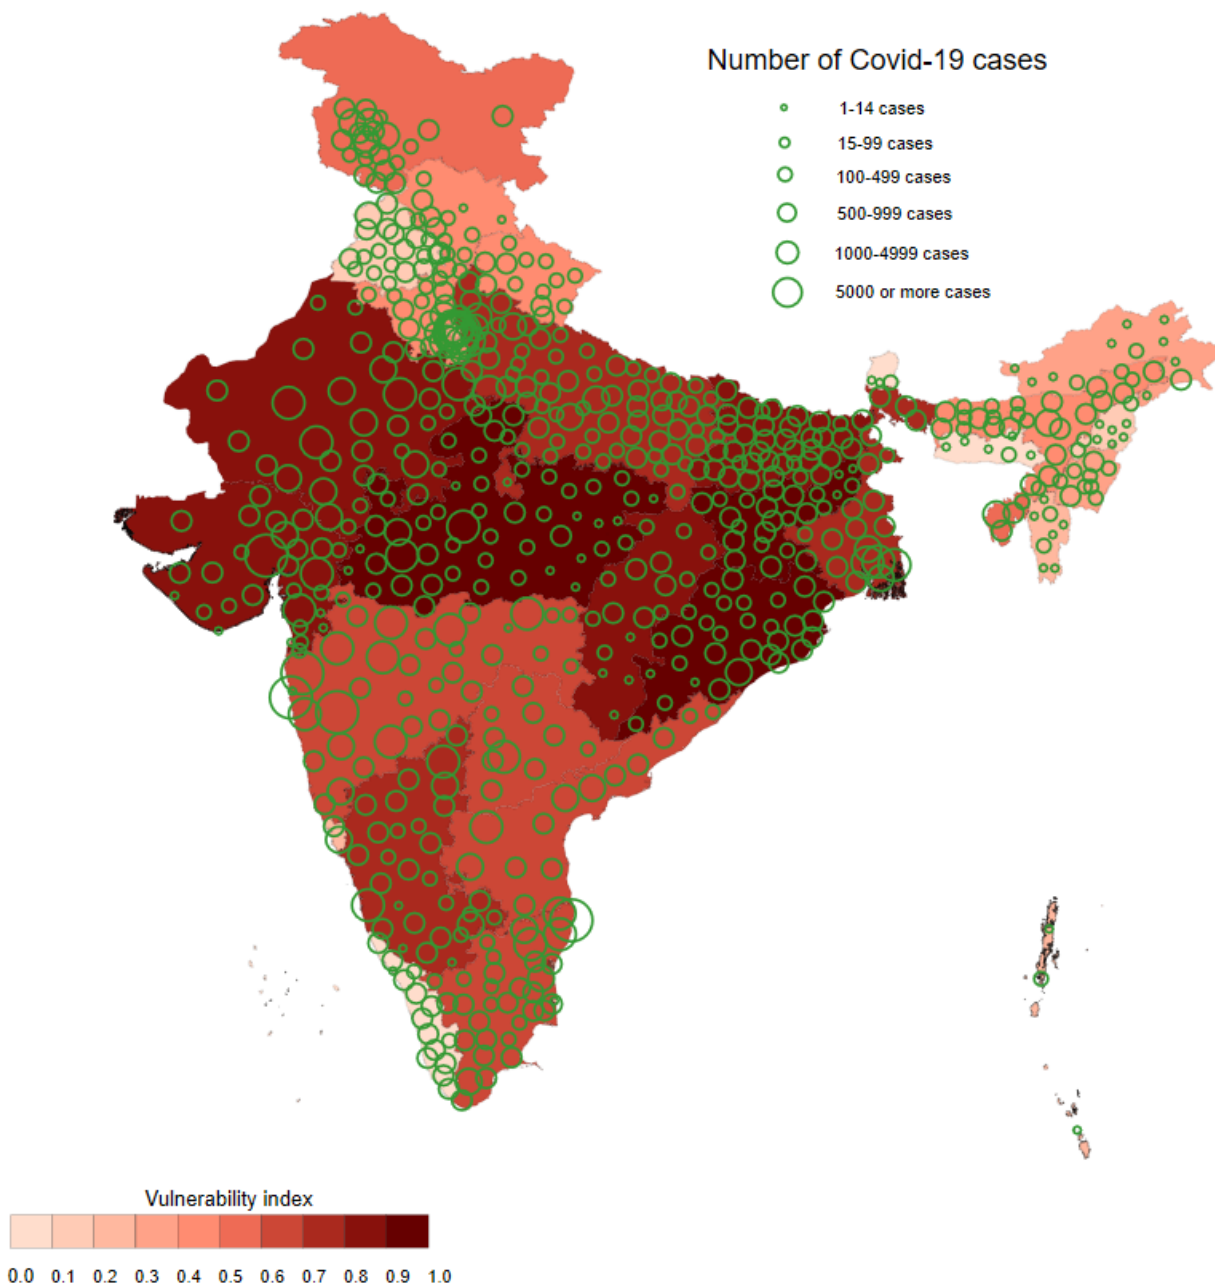

Note: This map does not reflect changes made in Jammu & Kashmir state (now union territory) in August 2019.



Appendix figure 4: State map for vulnerability due to non-availability of healthcare and number of confirmed COVID-19 cases as of June 17, 2020

### State map: Vulnerability due to non-availability of healthcare

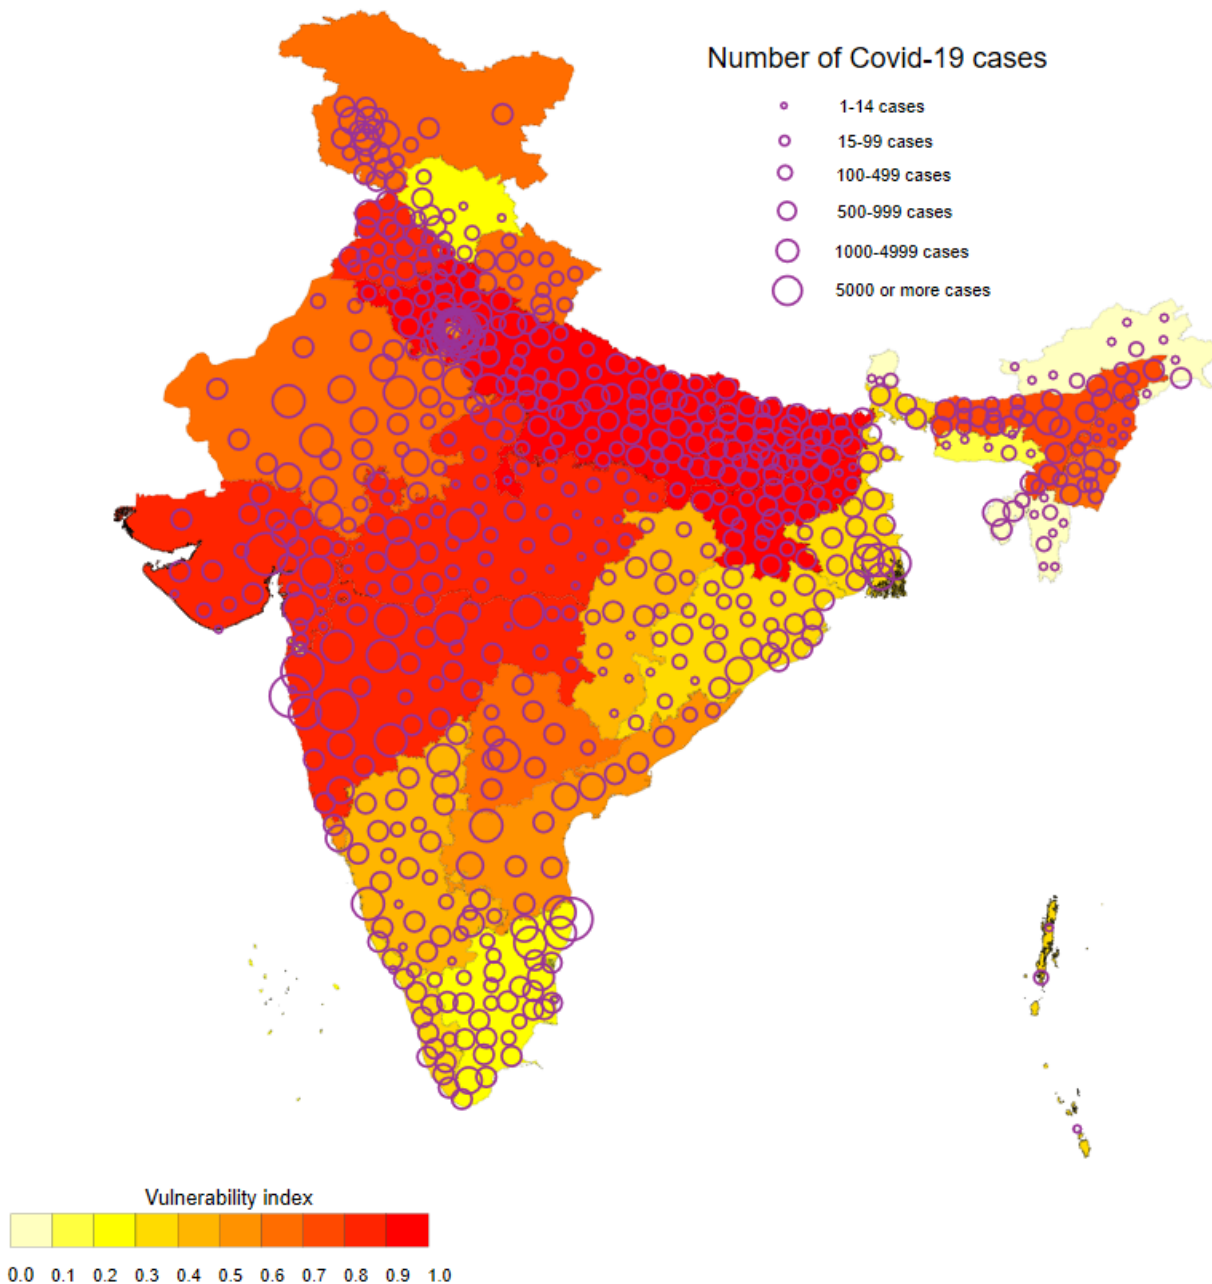

Note: This map does not reflect changes made in Jammu & Kashmir state (now union territory) in August 2019.



Appendix figure 5: State map for epidemiological vulnerability and number of confirmed COVID-19 cases as of June 17, 2020

### State map: Epidemiological vulnerability

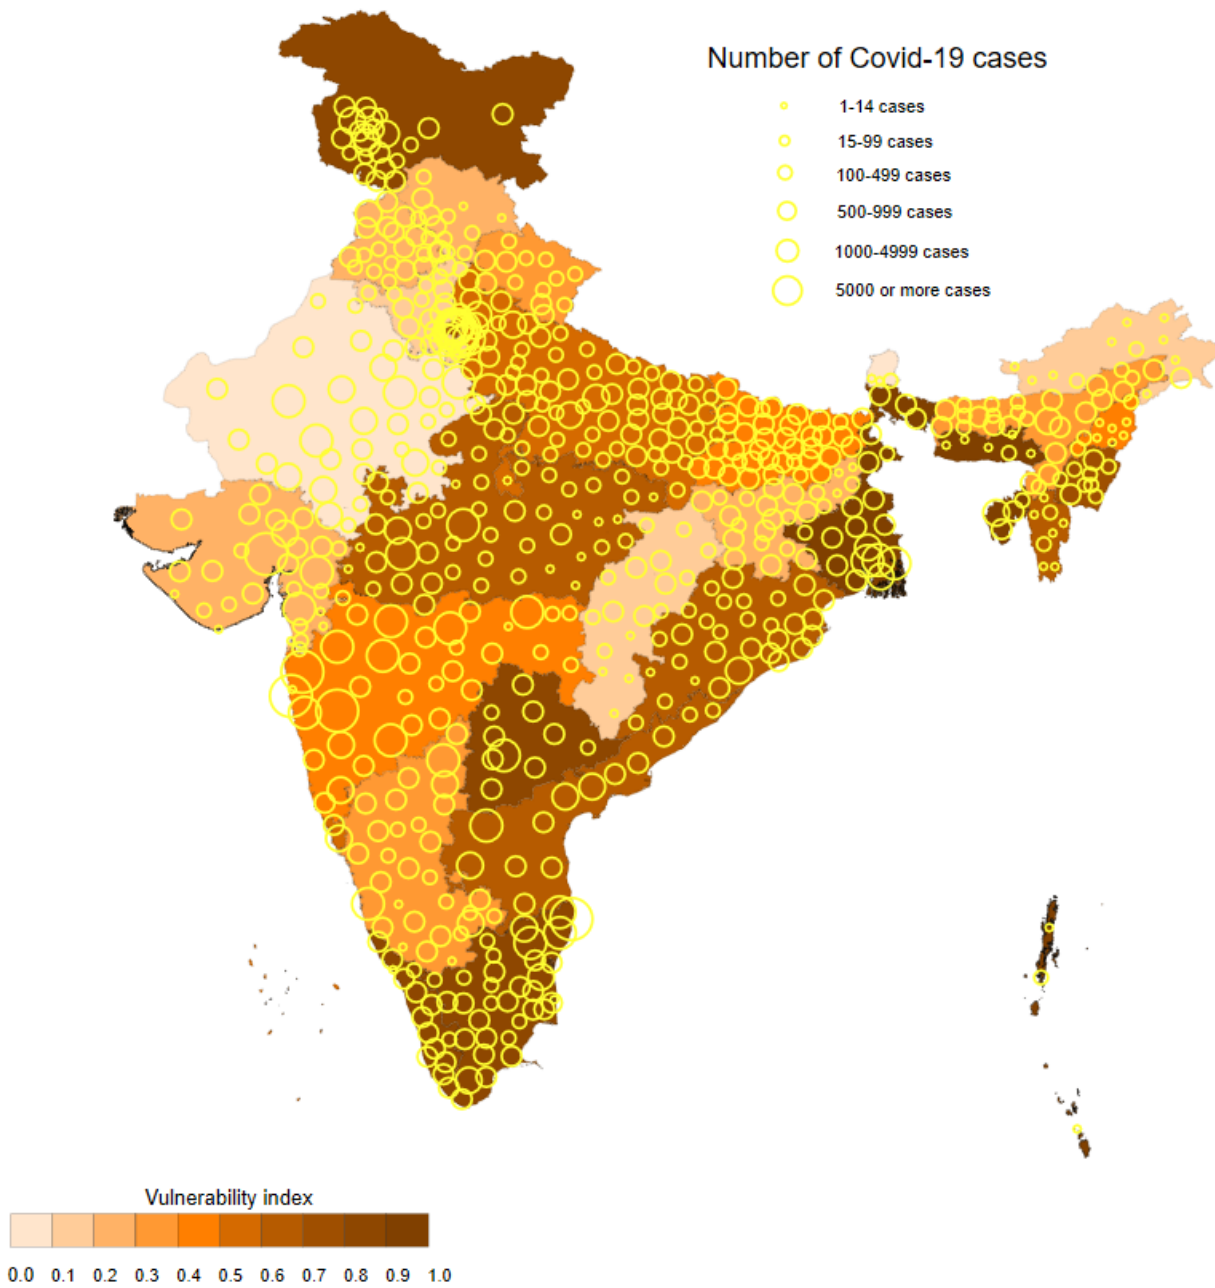

Note: This map does not reflect changes made in Jammu & Kashmir state (now union territory) in August 2019.

Appendix figure 6: District map for socio-economic vulnerability and number of confirmed COVID-19 cases as of June 17, 2020

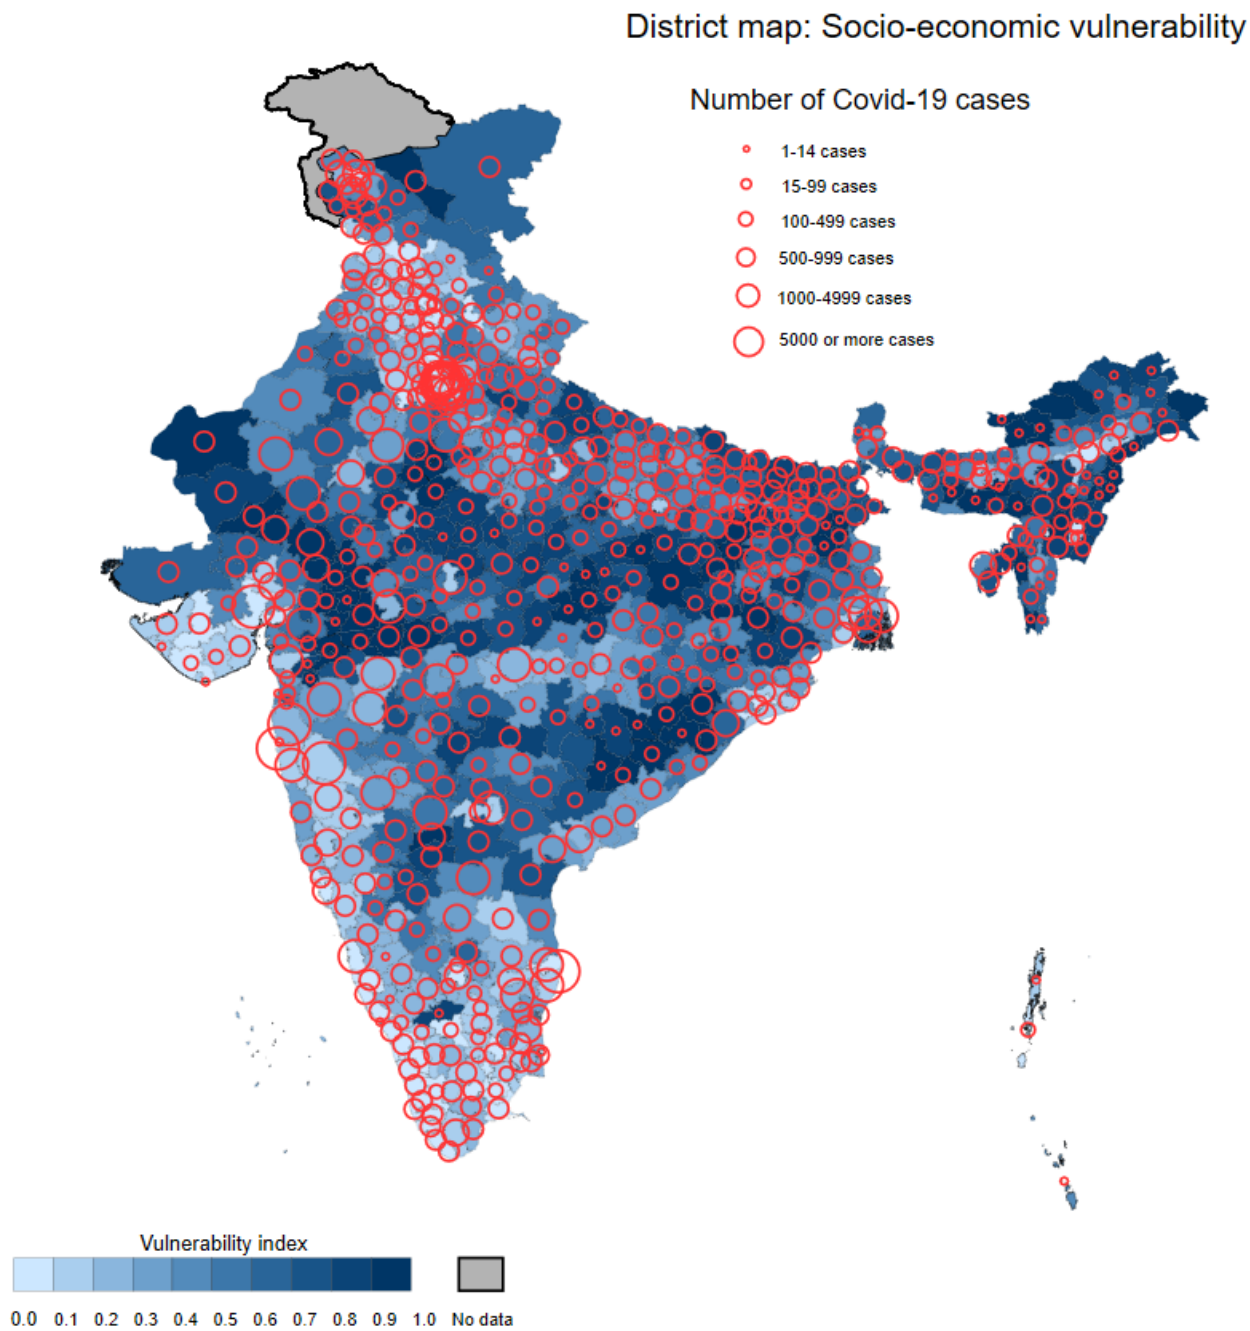

**Note:** This map does not reflect changes made in Jammu & Kashmir state (now union territory) in August 2019.

Appendix figure 7: District map for demographic vulnerability and number of confirmed COVID-19 cases as of June 17, 2020

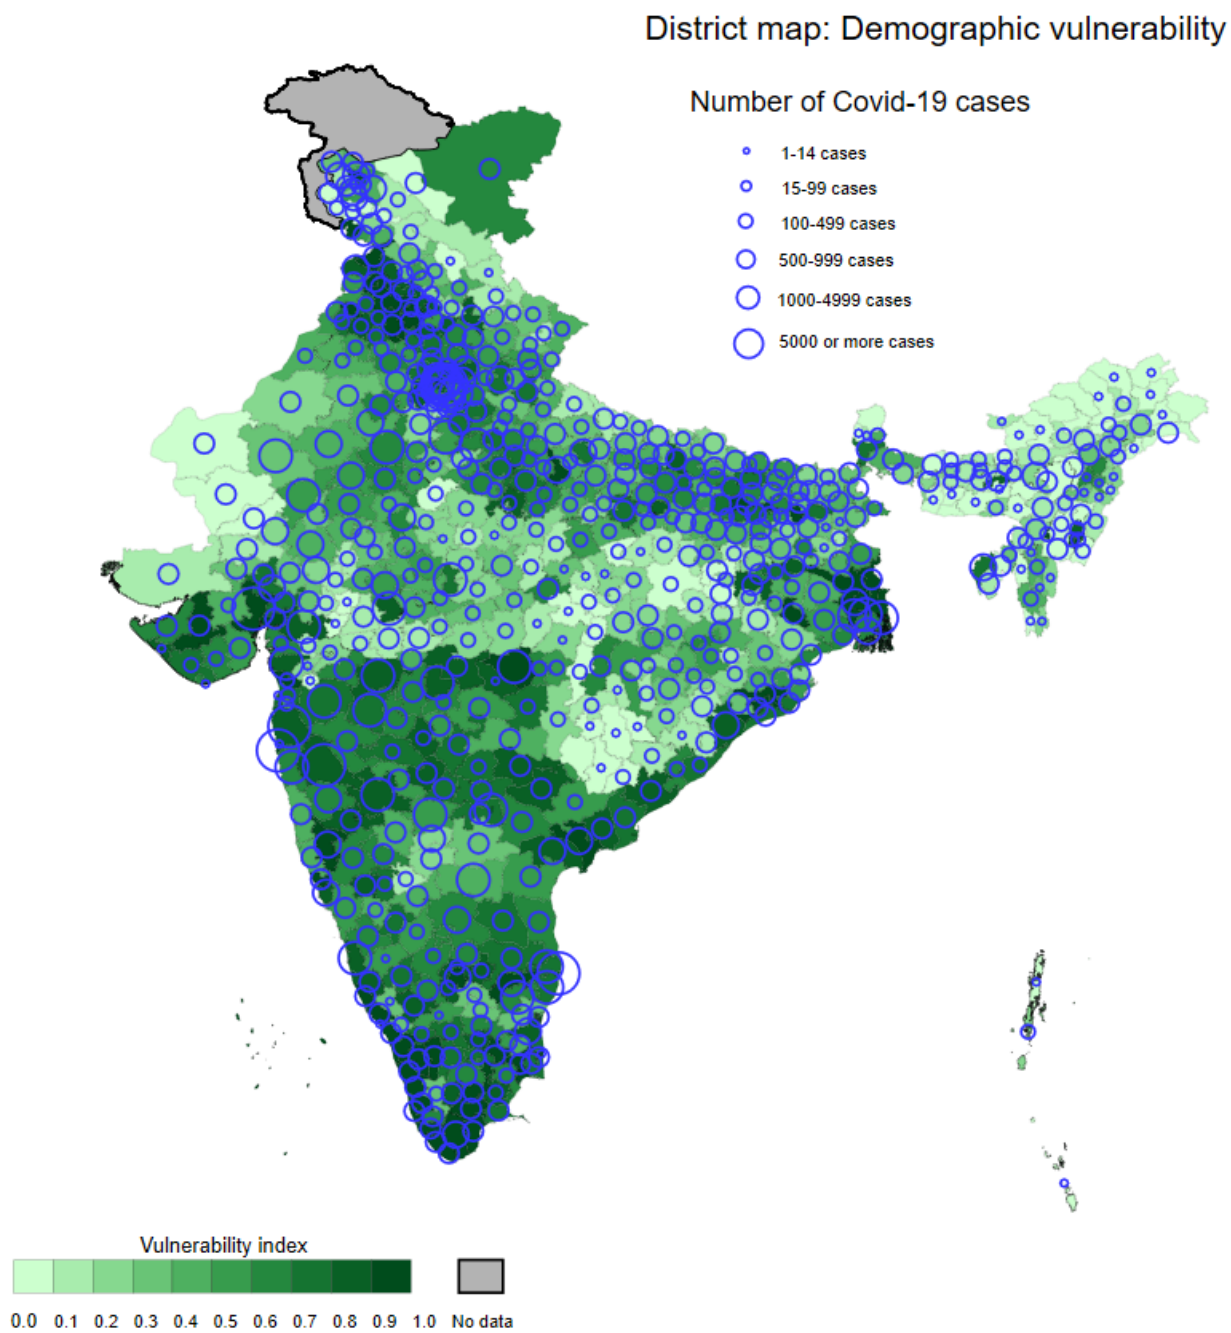

**Note: This map does not reflect changes made in Jammu & Kashmir state (now union territory) in August 2019.**

Appendix figure 8: District map for vulnerability due to poor housing and hygiene condition and number of confirmed COVID-19 cases as of June 17, 2020

### District map: Vulnerability due to housing and hygiene condition

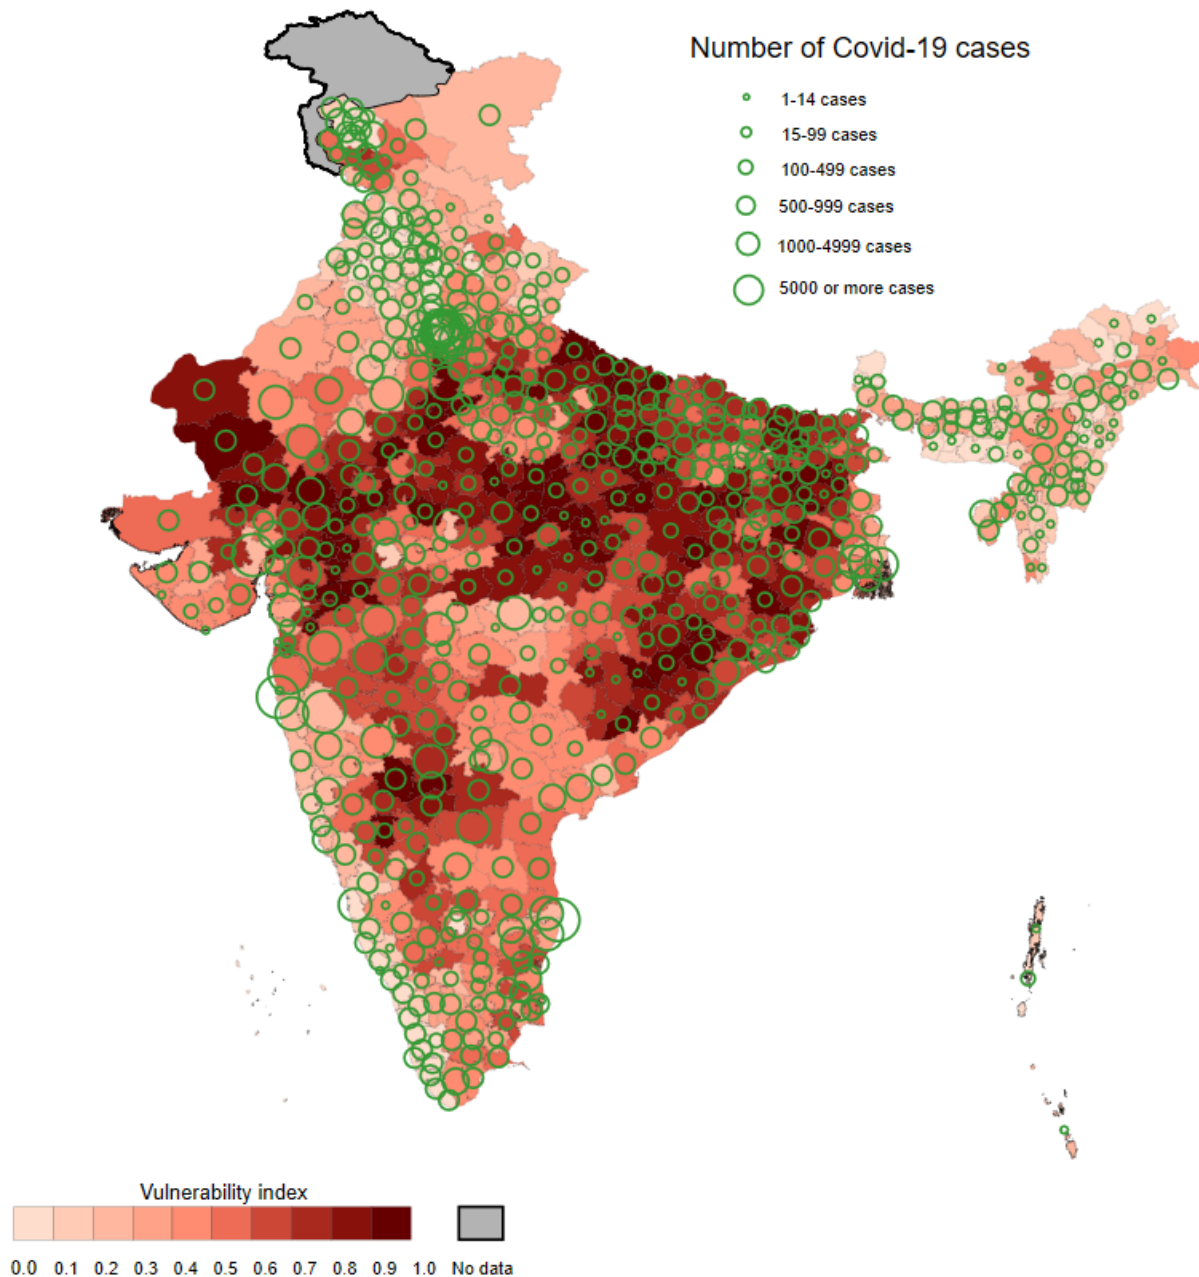

**Note: This map does not reflect changes made in Jammu & Kashmir state (now union territory) in August 2019.**

Appendix figure 9: District map for vulnerability due to non-availability of health care and number of confirmed COVID-19 cases as of June 17, 2020

### District map: Vulnerability due to non-availability of healthcare

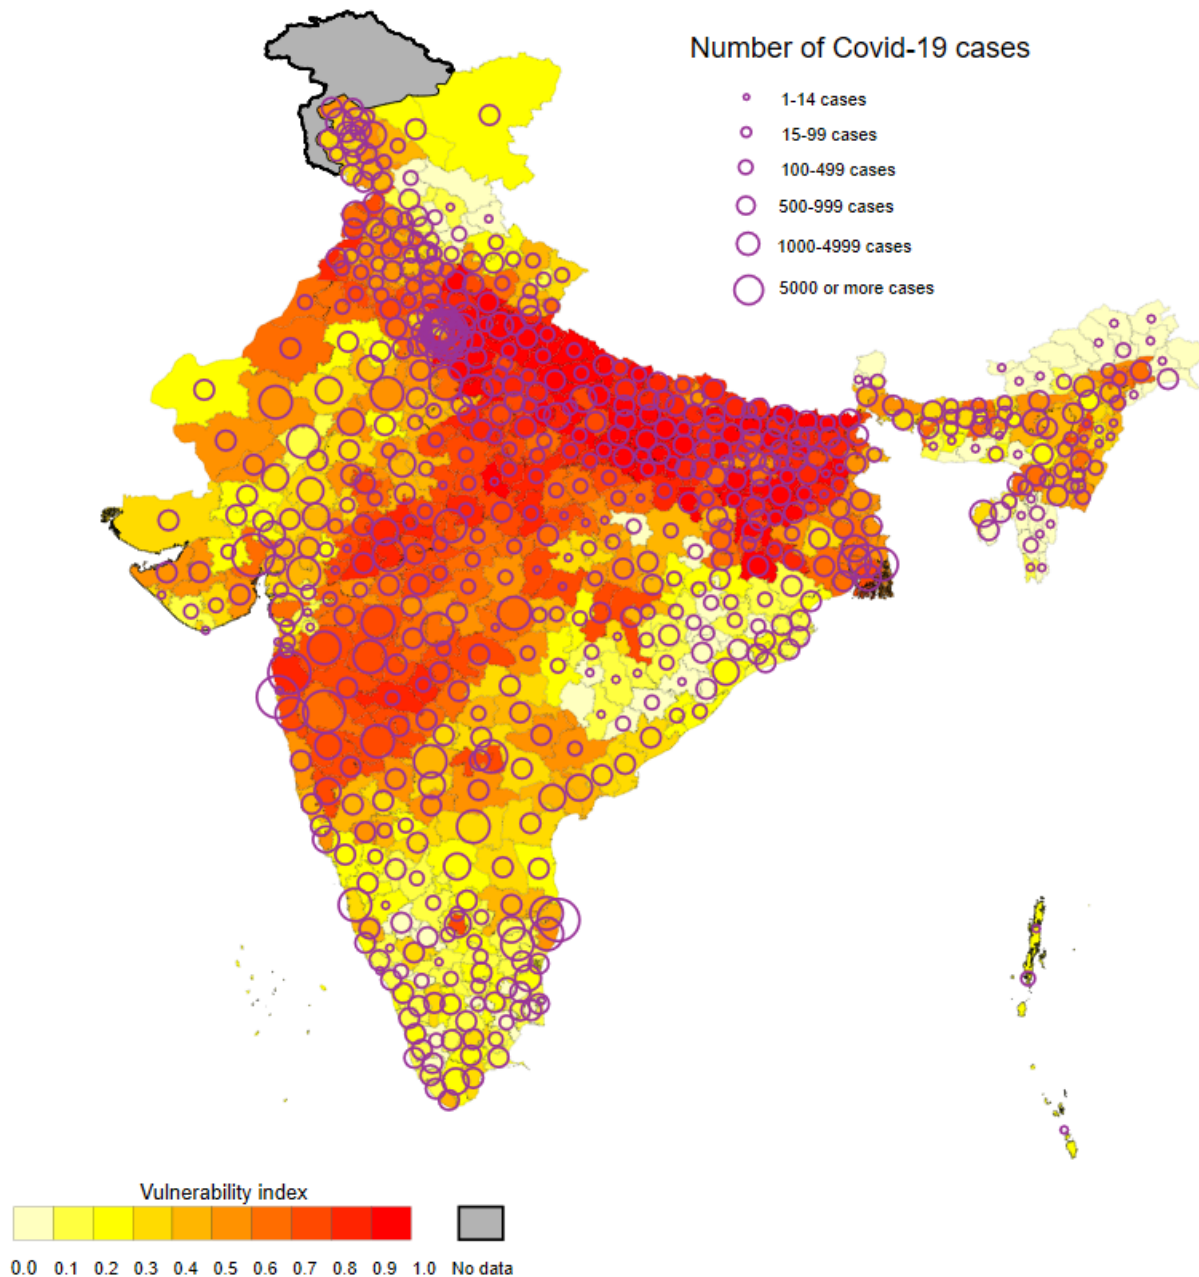

**Note: This map does not reflect changes made in Jammu & Kashmir state (now union territory) in August 2019.**



Appendix figure 10: District map for epidemiological vulnerability and number of confirmed COVID-19 cases as of June 17, 2020

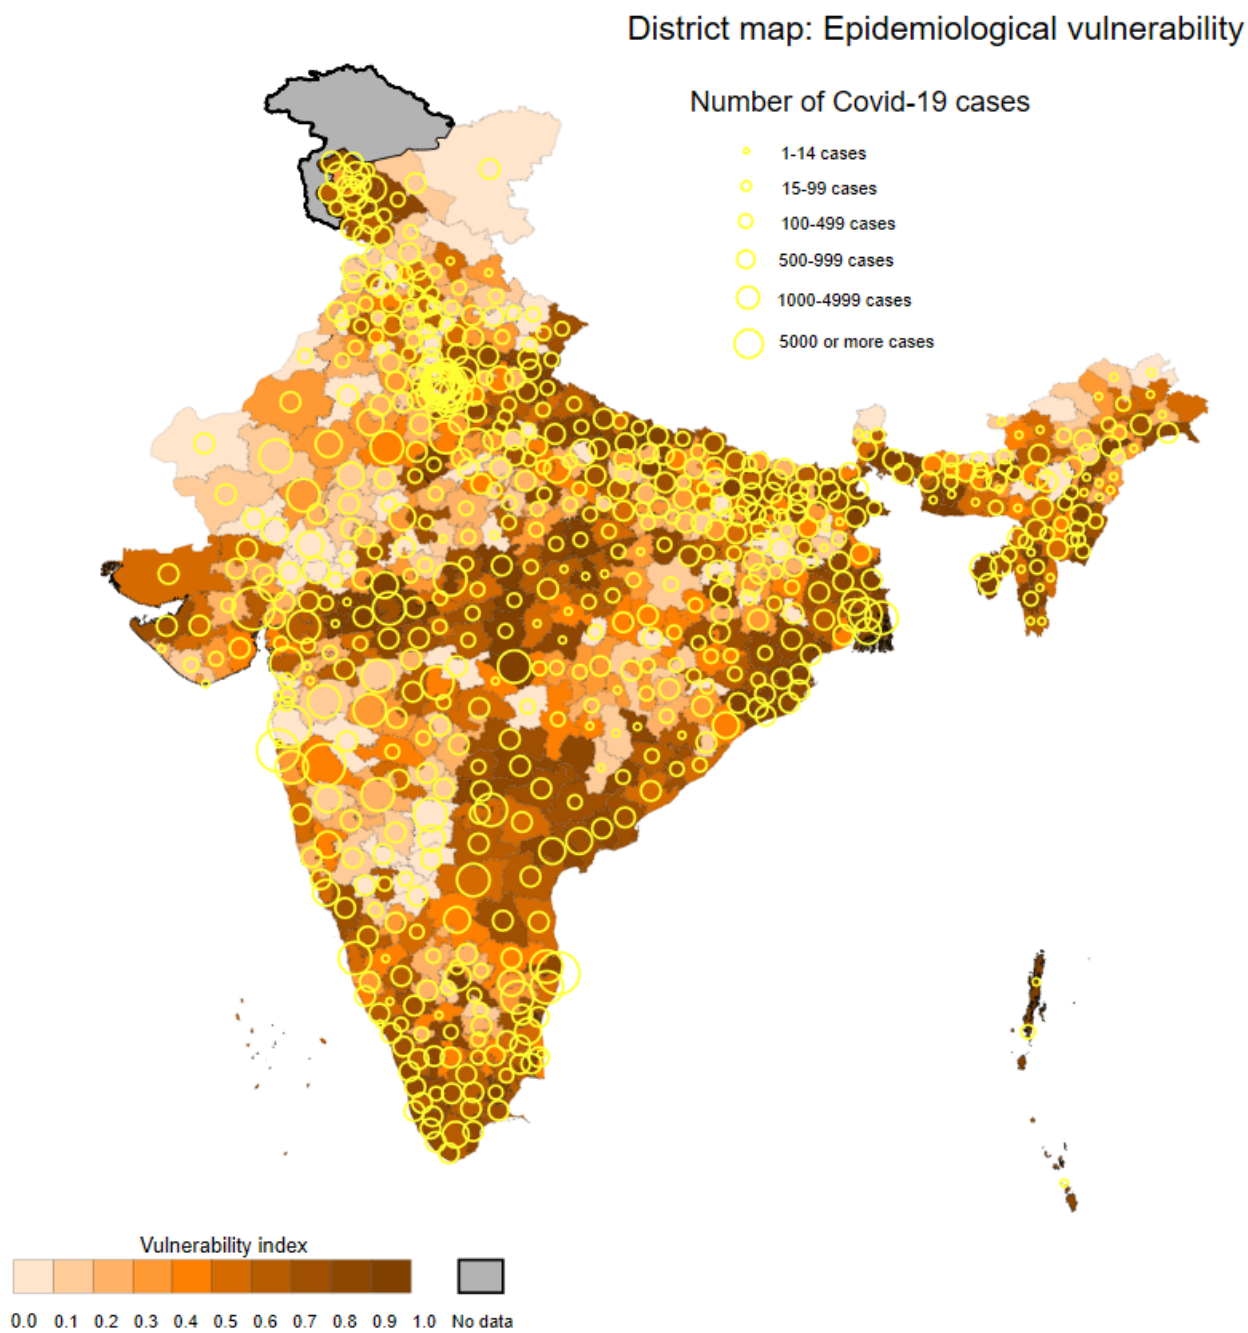

Note: This map does not reflect changes made in Jammu & Kashmir state (now union territory) in August 2019.

## Appendix C: District level vulnerability score

Appendix Table 1: Domain-wise and overall COVID-vulnerability score by district

| State/Union Territory | District               | Socio-economic vulnerability | Demographic vulnerability | Vulnerability due to housing condition | Vulnerability due to non-availability of healthcare | Epidemiological vulnerability | Overall Vulnerability |
|-----------------------|------------------------|------------------------------|---------------------------|----------------------------------------|-----------------------------------------------------|-------------------------------|-----------------------|
| Sikkim                | South District         | 0.311                        | 0.103                     | 0.000                                  | 0.063                                               | 0.009                         | 0.000                 |
| Sikkim                | North District         | 0.642                        | 0.008                     | 0.003                                  | 0.036                                               | 0.034                         | 0.002                 |
| Sikkim                | West District          | 0.628                        | 0.033                     | 0.000                                  | 0.064                                               | 0.116                         | 0.003                 |
| Assam                 | Jorhat                 | 0.059                        | 0.302                     | 0.155                                  | 0.252                                               | 0.164                         | 0.005                 |
| Himachal Pradesh      | Kangra                 | 0.039                        | 0.357                     | 0.210                                  | 0.180                                               | 0.166                         | 0.006                 |
| Uttarakhand           | Rudraprayag            | 0.297                        | 0.224                     | 0.185                                  | 0.260                                               | 0.033                         | 0.008                 |
| Arunachal Pradesh     | Dibang Valley          | 0.876                        | 0.094                     | 0.017                                  | 0.025                                               | 0.063                         | 0.009                 |
| Arunachal Pradesh     | Lower Subansiri        | 0.775                        | 0.025                     | 0.097                                  | 0.011                                               | 0.172                         | 0.011                 |
| Himachal Pradesh      | Lahul And Spiti        | 0.601                        | 0.186                     | 0.219                                  | 0.066                                               | 0.023                         | 0.013                 |
| Himachal Pradesh      | Shimla                 | 0.153                        | 0.433                     | 0.228                                  | 0.042                                               | 0.286                         | 0.014                 |
| Arunachal Pradesh     | West Siang             | 0.753                        | 0.053                     | 0.014                                  | 0.005                                               | 0.326                         | 0.016                 |
| Arunachal Pradesh     | Upper Siang            | 0.847                        | 0.049                     | 0.105                                  | 0.003                                               | 0.166                         | 0.017                 |
| Himachal Pradesh      | Mandi                  | 0.258                        | 0.377                     | 0.280                                  | 0.049                                               | 0.216                         | 0.019                 |
| Assam                 | Golaghat               | 0.127                        | 0.080                     | 0.171                                  | 0.462                                               | 0.354                         | 0.020                 |
| Assam                 | Nalbari                | 0.111                        | 0.227                     | 0.045                                  | 0.235                                               | 0.576                         | 0.022                 |
| Himachal Pradesh      | Chamba                 | 0.560                        | 0.138                     | 0.360                                  | 0.039                                               | 0.103                         | 0.023                 |
| Jammu and Kashmir     | Baramula               | 0.261                        | 0.189                     | 0.039                                  | 0.383                                               | 0.338                         | 0.025                 |
| Arunachal Pradesh     | East Siang             | 0.520                        | 0.116                     | 0.088                                  | 0.000                                               | 0.562                         | 0.027                 |
| Haryana               | Panchkula              | 0.013                        | 0.814                     | 0.078                                  | 0.391                                               | 0.008                         | 0.028                 |
| Arunachal Pradesh     | Kurung Kumey           | 0.995                        | 0.002                     | 0.282                                  | 0.009                                               | 0.019                         | 0.030                 |
| Assam                 | Udalguri               | 0.567                        | 0.091                     | 0.119                                  | 0.371                                               | 0.177                         | 0.031                 |
| Uttarakhand           | Chamoli                | 0.388                        | 0.316                     | 0.189                                  | 0.408                                               | 0.027                         | 0.033                 |
| Arunachal Pradesh     | Papumpare              | 0.598                        | 0.117                     | 0.183                                  | 0.139                                               | 0.296                         | 0.034                 |
| Uttarakhand           | Tehri Garhwal          | 0.365                        | 0.329                     | 0.374                                  | 0.230                                               | 0.049                         | 0.036                 |
| Himachal Pradesh      | Kullu                  | 0.260                        | 0.092                     | 0.347                                  | 0.158                                               | 0.501                         | 0.038                 |
| Himachal Pradesh      | Kinnaur                | 0.509                        | 0.178                     | 0.264                                  | 0.053                                               | 0.365                         | 0.039                 |
| Kerala                | Idukki                 | 0.019                        | 0.335                     | 0.047                                  | 0.078                                               | 0.892                         | 0.041                 |
| Tamil Nadu            | Dharmapuri             | 0.182                        | 0.385                     | 0.520                                  | 0.122                                               | 0.196                         | 0.042                 |
| Himachal Pradesh      | Sirmaur                | 0.415                        | 0.279                     | 0.396                                  | 0.130                                               | 0.191                         | 0.044                 |
| Arunachal Pradesh     | Upper Subansiri        | 0.953                        | 0.042                     | 0.293                                  | 0.020                                               | 0.124                         | 0.045                 |
| Delhi                 | Central                | 0.100                        | 0.928                     | 0.097                                  | 0.125                                               | 0.208                         | 0.047                 |
| Meghalaya             | South Garo Hills       | 0.407                        | 0.003                     | 0.013                                  | 0.038                                               | 0.998                         | 0.049                 |
| Uttarakhand           | Almora                 | 0.382                        | 0.388                     | 0.243                                  | 0.415                                               | 0.053                         | 0.050                 |
| Delhi                 | West                   | 0.034                        | 0.983                     | 0.030                                  | 0.290                                               | 0.152                         | 0.052                 |
| Arunachal Pradesh     | Lohit                  | 0.790                        | 0.075                     | 0.390                                  | 0.016                                               | 0.224                         | 0.053                 |
| Arunachal Pradesh     | Tawang                 | 0.984                        | 0.103                     | 0.200                                  | 0.027                                               | 0.185                         | 0.055                 |
| Assam                 | Baksa                  | 0.516                        | 0.131                     | 0.149                                  | 0.654                                               | 0.050                         | 0.056                 |
| Karnataka             | Kodagu                 | 0.279                        | 0.394                     | 0.144                                  | 0.131                                               | 0.556                         | 0.058                 |
| Maharashtra           | Sindhudurg             | 0.214                        | 0.424                     | 0.116                                  | 0.468                                               | 0.288                         | 0.059                 |
| Himachal Pradesh      | Una                    | 0.089                        | 0.397                     | 0.164                                  | 0.444                                               | 0.427                         | 0.061                 |
| Puducherry            | Yanam                  | 0.066                        | 0.875                     | 0.180                                  | 0.185                                               | 0.227                         | 0.063                 |
| Daman&Diu             | Diu                    | 0.038                        | 0.969                     | 0.308                                  | 0.085                                               | 0.133                         | 0.063                 |
| Kerala                | Wayanad                | 0.147                        | 0.385                     | 0.164                                  | 0.061                                               | 0.776                         | 0.066                 |
| A&N Islands           | South Andaman          | 0.027                        | 0.202                     | 0.050                                  | 0.279                                               | 0.991                         | 0.067                 |
| Mizoram               | Champhai               | 0.590                        | 0.250                     | 0.142                                  | 0.013                                               | 0.552                         | 0.067                 |
| Tamil Nadu            | The Nilgiris           | 0.166                        | 0.740                     | 0.338                                  | 0.041                                               | 0.268                         | 0.070                 |
| Himachal Pradesh      | Solan                  | 0.236                        | 0.290                     | 0.269                                  | 0.121                                               | 0.645                         | 0.072                 |
| Himachal Pradesh      | Bilaspur               | 0.119                        | 0.457                     | 0.310                                  | 0.156                                               | 0.523                         | 0.074                 |
| Assam                 | Chirang                | 0.667                        | 0.050                     | 0.249                                  | 0.315                                               | 0.304                         | 0.075                 |
| Arunachal Pradesh     | Tirap                  | 0.962                        | 0.038                     | 0.232                                  | 0.022                                               | 0.341                         | 0.077                 |
| Chhattisgarh          | Rajnandgaon            | 0.324                        | 0.099                     | 0.548                                  | 0.238                                               | 0.388                         | 0.078                 |
| Assam                 | Lakhimpur              | 0.427                        | 0.155                     | 0.322                                  | 0.441                                               | 0.252                         | 0.080                 |
| Gujarat               | Junagadh               | 0.097                        | 0.709                     | 0.426                                  | 0.192                                               | 0.175                         | 0.081                 |
| Haryana               | Sonipat                | 0.045                        | 0.750                     | 0.113                                  | 0.685                                               | 0.016                         | 0.083                 |
| Assam                 | Barpeta                | 0.454                        | 0.196                     | 0.194                                  | 0.315                                               | 0.452                         | 0.085                 |
| Himachal Pradesh      | Hamirpur               | 0.114                        | 0.552                     | 0.239                                  | 0.196                                               | 0.515                         | 0.086                 |
| Meghalaya             | West Khasi Hills       | 0.991                        | 0.013                     | 0.036                                  | 0.077                                               | 0.504                         | 0.088                 |
| A&N Islands           | North & Middle Andaman | 0.163                        | 0.063                     | 0.153                                  | 0.247                                               | 0.995                         | 0.089                 |
| Chhattisgarh          | Uttar Bastar           |                              |                           |                                        |                                                     |                               |                       |
|                       | Kanker                 | 0.571                        | 0.113                     | 0.609                                  | 0.103                                               | 0.227                         | 0.091                 |
| Arunachal Pradesh     | Lower Dibang Valley    | 0.704                        | 0.055                     | 0.305                                  | 0.055                                               | 0.505                         | 0.092                 |
| Uttarakhand           | Uttarkashi             | 0.565                        | 0.130                     | 0.510                                  | 0.263                                               | 0.161                         | 0.094                 |
| Arunachal Pradesh     | West Kameng            | 0.908                        | 0.044                     | 0.235                                  | 0.045                                               | 0.402                         | 0.095                 |



| State/Union Territory | District         | Socio-economic vulnerability | Demographic vulnerability | Vulnerability due to housing condition | Vulnerability due to non-availability of healthcare | Epidemiological vulnerability | Overall Vulnerability |
|-----------------------|------------------|------------------------------|---------------------------|----------------------------------------|-----------------------------------------------------|-------------------------------|-----------------------|
| Sikkim                | East District    | 0.313                        | 0.448                     | 0.011                                  | 0.194                                               | 0.689                         | 0.097                 |
| Jammu and Kashmir     | Shupiyan         | 0.385                        | 0.282                     | 0.053                                  | 0.491                                               | 0.457                         | 0.099                 |
| Kerala                | Kasaragod        | 0.022                        | 0.966                     | 0.023                                  | 0.224                                               | 0.441                         | 0.100                 |
| Meghalaya             | Jaintia Hills    | 1.000                        | 0.005                     | 0.136                                  | 0.052                                               | 0.488                         | 0.102                 |
| Haryana               | Panipat          | 0.042                        | 0.775                     | 0.049                                  | 0.818                                               | 0.000                         | 0.103                 |
| Meghalaya             | Ribhoi           | 0.994                        | 0.020                     | 0.135                                  | 0.142                                               | 0.394                         | 0.105                 |
| Rajasthan             | Jhunjhunun       | 0.307                        | 0.631                     | 0.205                                  | 0.277                                               | 0.268                         | 0.106                 |
| Rajasthan             | Ajmer            | 0.230                        | 0.504                     | 0.310                                  | 0.504                                               | 0.141                         | 0.108                 |
| Mizoram               | Saiha            | 0.690                        | 0.241                     | 0.111                                  | 0.017                                               | 0.635                         | 0.110                 |
| Haryana               | Mahendragarh     | 0.055                        | 0.595                     | 0.304                                  | 0.646                                               | 0.102                         | 0.111                 |
| Chandigarh            | Chandigarh       | 0.044                        | 0.973                     | 0.108                                  | 0.266                                               | 0.313                         | 0.113                 |
| Haryana               | Karnal           | 0.202                        | 0.742                     | 0.063                                  | 0.678                                               | 0.031                         | 0.114                 |
| Haryana               | Kurukshetra      | 0.081                        | 0.861                     | 0.061                                  | 0.653                                               | 0.070                         | 0.116                 |
| Jammu and Kashmir     | Leh              | 0.632                        | 0.601                     | 0.218                                  | 0.247                                               | 0.044                         | 0.117                 |
| Assam                 | Kamrup           | 0.291                        | 0.160                     | 0.191                                  | 0.615                                               | 0.485                         | 0.119                 |
| Jammu and Kashmir     | Kargil           | 0.901                        | 0.088                     | 0.324                                  | 0.282                                               | 0.149                         | 0.121                 |
| Kerala                | Pathanamthitta   | 0.011                        | 0.664                     | 0.085                                  | 0.099                                               | 0.890                         | 0.122                 |
| Assam                 | Kokrajhar        | 0.729                        | 0.056                     | 0.146                                  | 0.327                                               | 0.496                         | 0.124                 |
| Kerala                | Kottayam         | 0.002                        | 0.972                     | 0.020                                  | 0.102                                               | 0.660                         | 0.125                 |
| Jammu and Kashmir     | Pulwama          | 0.236                        | 0.709                     | 0.027                                  | 0.582                                               | 0.203                         | 0.127                 |
| Assam                 | Dibrugarh        | 0.241                        | 0.266                     | 0.196                                  | 0.690                                               | 0.371                         | 0.128                 |
| Tamil Nadu            | Salem            | 0.197                        | 0.682                     | 0.466                                  | 0.214                                               | 0.205                         | 0.130                 |
| Punjab                | Hoshiarpur       | 0.175                        | 0.820                     | 0.095                                  | 0.592                                               | 0.094                         | 0.131                 |
| Punjab                | Fatehgarh Sahib  | 0.164                        | 0.942                     | 0.171                                  | 0.391                                               | 0.121                         | 0.133                 |
| Nagaland              | Phek             | 0.937                        | 0.213                     | 0.075                                  | 0.326                                               | 0.244                         | 0.135                 |
| Karnataka             | Mandya           | 0.230                        | 0.668                     | 0.541                                  | 0.097                                               | 0.260                         | 0.136                 |
| Rajasthan             | Churu            | 0.754                        | 0.315                     | 0.380                                  | 0.271                                               | 0.078                         | 0.138                 |
| Punjab                | Jalandhar        | 0.178                        | 0.977                     | 0.044                                  | 0.551                                               | 0.055                         | 0.139                 |
| Mizoram               | Serchhip         | 0.526                        | 0.399                     | 0.169                                  | 0.005                                               | 0.709                         | 0.141                 |
| Haryana               | Bhiwani          | 0.100                        | 0.474                     | 0.238                                  | 0.665                                               | 0.330                         | 0.141                 |
| Gujarat               | Mahesana         | 0.108                        | 0.707                     | 0.571                                  | 0.200                                               | 0.222                         | 0.144                 |
| Mizoram               | Mamit            | 0.936                        | 0.088                     | 0.244                                  | 0.019                                               | 0.523                         | 0.146                 |
| Delhi                 | North West       | 0.095                        | 0.914                     | 0.252                                  | 0.421                                               | 0.130                         | 0.147                 |
| Assam                 | Nagaon           | 0.344                        | 0.218                     | 0.225                                  | 0.551                                               | 0.480                         | 0.149                 |
| Assam                 | Karbi Anglong    | 0.820                        | 0.019                     | 0.407                                  | 0.480                                               | 0.094                         | 0.150                 |
| Uttarakhand           | Bageshwar        | 0.593                        | 0.182                     | 0.283                                  | 0.172                                               | 0.592                         | 0.152                 |
| Rajasthan             | Sikar            | 0.327                        | 0.455                     | 0.230                                  | 0.462                                               | 0.347                         | 0.152                 |
| Haryana               | Yamunanagar      | 0.146                        | 0.851                     | 0.133                                  | 0.649                                               | 0.047                         | 0.155                 |
| A&N Islands           | Nicobars         | 0.418                        | 0.009                     | 0.299                                  | 0.213                                               | 0.898                         | 0.156                 |
| Assam                 | Bongaigaon       | 0.412                        | 0.280                     | 0.296                                  | 0.390                                               | 0.462                         | 0.158                 |
| Karnataka             | Ramanagara       | 0.221                        | 0.822                     | 0.541                                  | 0.138                                               | 0.117                         | 0.158                 |
| Punjab                | Barnala          | 0.255                        | 0.886                     | 0.092                                  | 0.484                                               | 0.125                         | 0.161                 |
| Kerala                | Kannur           | 0.014                        | 0.987                     | 0.016                                  | 0.175                                               | 0.651                         | 0.163                 |
| Karnataka             | Koppal           | 0.728                        | 0.149                     | 0.667                                  | 0.280                                               | 0.025                         | 0.164                 |
| Chhattisgarh          | Dhamtari         | 0.393                        | 0.167                     | 0.557                                  | 0.387                                               | 0.344                         | 0.164                 |
| Haryana               | Gurgaon          | 0.180                        | 0.617                     | 0.182                                  | 0.826                                               | 0.044                         | 0.164                 |
| Karnataka             | Davanagere       | 0.213                        | 0.717                     | 0.385                                  | 0.139                                               | 0.396                         | 0.169                 |
| Haryana               | Fatehabad        | 0.336                        | 0.587                     | 0.149                                  | 0.695                                               | 0.089                         | 0.171                 |
| Puducherry            | Mahe             | 0.000                        | 1.000                     | 0.006                                  | 0.050                                               | 0.808                         | 0.172                 |
| Assam                 | Sonitpur         | 0.305                        | 0.141                     | 0.163                                  | 0.562                                               | 0.693                         | 0.172                 |
| Punjab                | Patiala          | 0.127                        | 0.920                     | 0.105                                  | 0.418                                               | 0.299                         | 0.175                 |
| Rajasthan             | Ganganagar       | 0.537                        | 0.441                     | 0.279                                  | 0.606                                               | 0.014                         | 0.177                 |
| Daman & Diu           | Daman            | 0.264                        | 0.836                     | 0.161                                  | 0.609                                               | 0.013                         | 0.178                 |
| Haryana               | Ambala           | 0.081                        | 0.582                     | 0.034                                  | 0.505                                               | 0.681                         | 0.180                 |
| Uttarakhand           | Dehradun         | 0.061                        | 0.869                     | 0.070                                  | 0.588                                               | 0.305                         | 0.182                 |
| Karnataka             | Udupi            | 0.075                        | 0.825                     | 0.083                                  | 0.354                                               | 0.560                         | 0.183                 |
| Haryana               | Rohtak           | 0.244                        | 0.793                     | 0.285                                  | 0.377                                               | 0.199                         | 0.185                 |
| Rajasthan             | Jodhpur          | 0.402                        | 0.347                     | 0.443                                  | 0.565                                               | 0.144                         | 0.186                 |
| Tamil Nadu            | Namakkal         | 0.171                        | 0.850                     | 0.402                                  | 0.152                                               | 0.327                         | 0.186                 |
| Meghalaya             | East Khasi Hills | 0.820                        | 0.282                     | 0.052                                  | 0.221                                               | 0.529                         | 0.189                 |
| Tamil Nadu            | Tiruvannamalai   | 0.269                        | 0.623                     | 0.579                                  | 0.111                                               | 0.324                         | 0.191                 |
| Tamil Nadu            | Vellore          | 0.142                        | 0.933                     | 0.313                                  | 0.186                                               | 0.336                         | 0.192                 |
| Karnataka             | Shimoga          | 0.228                        | 0.676                     | 0.147                                  | 0.221                                               | 0.640                         | 0.194                 |
| Gujarat               | Navsari          | 0.302                        | 0.923                     | 0.382                                  | 0.211                                               | 0.097                         | 0.196                 |
| Karnataka             | Uttara Kannada   | 0.167                        | 0.557                     | 0.208                                  | 0.243                                               | 0.742                         | 0.197                 |
| Delhi                 | New Delhi        | 0.141                        | 0.798                     | 0.067                                  | 0.034                                               | 0.878                         | 0.199                 |
| Punjab                | Sangrur          | 0.254                        | 0.825                     | 0.081                                  | 0.498                                               | 0.264                         | 0.200                 |
| Odisha                | Baudh            | 0.632                        | 0.249                     | 0.926                                  | 0.080                                               | 0.038                         | 0.202                 |

| State/Union Territory | District                   | Socio-economic vulnerability | Demographic vulnerability | Vulnerability due to housing condition | Vulnerability due to non-availability of healthcare | Epidemiological vulnerability | Overall Vulnerability |
|-----------------------|----------------------------|------------------------------|---------------------------|----------------------------------------|-----------------------------------------------------|-------------------------------|-----------------------|
| Haryana               | Hisar                      | 0.202                        | 0.654                     | 0.108                                  | 0.739                                               | 0.225                         | 0.203                 |
| Assam                 | Darrang                    | 0.379                        | 0.127                     | 0.125                                  | 0.366                                               | 0.933                         | 0.205                 |
| Goa                   | North Goa                  | 0.027                        | 0.934                     | 0.127                                  | 0.268                                               | 0.577                         | 0.207                 |
| Puducherry            | Karaikal                   | 0.080                        | 0.984                     | 0.327                                  | 0.074                                               | 0.479                         | 0.208                 |
| Maharashtra           | Gondiya                    | 0.297                        | 0.520                     | 0.343                                  | 0.471                                               | 0.318                         | 0.210                 |
| Tamil Nadu            | Karur                      | 0.199                        | 0.778                     | 0.387                                  | 0.083                                               | 0.505                         | 0.211                 |
| Meghalaya             | West Garo Hills            | 0.776                        | 0.031                     | 0.025                                  | 0.124                                               | 0.997                         | 0.213                 |
| Arunachal Pradesh     | Changlang                  | 0.853                        | 0.022                     | 0.210                                  | 0.033                                               | 0.837                         | 0.214                 |
| Kerala                | Kozhikode                  | 0.008                        | 0.991                     | 0.064                                  | 0.152                                               | 0.748                         | 0.216                 |
| Karnataka             | Dakshina Kannada           | 0.061                        | 0.886                     | 0.164                                  | 0.490                                               | 0.362                         | 0.216                 |
| Gujarat               | Sabarkantha                | 0.546                        | 0.304                     | 0.773                                  | 0.308                                               | 0.036                         | 0.219                 |
| Karnataka             | Chikmagalur                | 0.271                        | 0.512                     | 0.484                                  | 0.233                                               | 0.468                         | 0.219                 |
| Kerala                | Palakkad                   | 0.020                        | 0.915                     | 0.156                                  | 0.182                                               | 0.700                         | 0.222                 |
| Chhattisgarh          | Korea (Koriya)             | 0.731                        | 0.208                     | 0.603                                  | 0.075                                               | 0.357                         | 0.222                 |
| Arunachal Pradesh     | Anjaw                      | 0.959                        | 0.000                     | 0.421                                  | 0.002                                               | 0.596                         | 0.225                 |
| Uttarakhand           | Garhwal                    | 0.218                        | 0.462                     | 0.340                                  | 0.662                                               | 0.300                         | 0.227                 |
| Mizoram               | Aizawl                     | 0.324                        | 0.485                     | 0.114                                  | 0.070                                               | 0.989                         | 0.228                 |
| Punjab                | Faridkot                   | 0.283                        | 0.905                     | 0.066                                  | 0.496                                               | 0.235                         | 0.230                 |
| Tamil Nadu            | Ariyalur                   | 0.169                        | 0.476                     | 0.670                                  | 0.059                                               | 0.628                         | 0.232                 |
| Odisha                | Bargarh                    | 0.552                        | 0.426                     | 0.790                                  | 0.106                                               | 0.131                         | 0.233                 |
| Nagaland              | Kiphire                    | 0.951                        | 0.153                     | 0.152                                  | 0.313                                               | 0.437                         | 0.235                 |
| Haryana               | Faridabad                  | 0.091                        | 0.800                     | 0.294                                  | 0.740                                               | 0.085                         | 0.236                 |
| Delhi                 | South West                 | 0.064                        | 0.840                     | 0.247                                  | 0.247                                               | 0.612                         | 0.238                 |
| Karnataka             | Kolar                      | 0.390                        | 0.847                     | 0.369                                  | 0.161                                               | 0.247                         | 0.239                 |
| Gujarat               | Gandhinagar                | 0.186                        | 0.762                     | 0.462                                  | 0.282                                               | 0.335                         | 0.241                 |
| Tamil Nadu            | Tiruppur                   | 0.268                        | 0.732                     | 0.307                                  | 0.293                                               | 0.430                         | 0.243                 |
| Gujarat               | Porbandar                  | 0.199                        | 0.829                     | 0.435                                  | 0.330                                               | 0.246                         | 0.244                 |
| Punjab                | Tarn Taran                 | 0.371                        | 0.526                     | 0.326                                  | 0.714                                               | 0.103                         | 0.244                 |
| Tamil Nadu            | Dindigul                   | 0.144                        | 0.634                     | 0.468                                  | 0.110                                               | 0.685                         | 0.247                 |
| Jammu and Kashmir     | Ganderbal                  | 0.432                        | 0.529                     | 0.056                                  | 0.302                                               | 0.728                         | 0.249                 |
| Kerala                | Thiruvananthapuram         | 0.023                        | 0.995                     | 0.055                                  | 0.100                                               | 0.875                         | 0.250                 |
| Kerala                | Alappuzha                  | 0.005                        | 0.998                     | 0.019                                  | 0.111                                               | 0.915                         | 0.250                 |
| Chhattisgarh          | Bastar                     | 0.886                        | 0.052                     | 0.797                                  | 0.191                                               | 0.128                         | 0.254                 |
| Kerala                | Thrissur                   | 0.003                        | 0.989                     | 0.042                                  | 0.197                                               | 0.823                         | 0.255                 |
| Punjab                | Sahibzada Ajit Singh Nagar | 0.086                        | 0.833                     | 0.216                                  | 0.380                                               | 0.543                         | 0.257                 |
| Jammu and Kashmir     | Badgam                     | 0.399                        | 0.451                     | 0.033                                  | 0.383                                               | 0.795                         | 0.258                 |
| Odisha                | Gajapati                   | 0.983                        | 0.127                     | 0.750                                  | 0.091                                               | 0.113                         | 0.260                 |
| Gujarat               | Amreli                     | 0.150                        | 0.695                     | 0.480                                  | 0.341                                               | 0.399                         | 0.261                 |
| Kerala                | Malappuram                 | 0.017                        | 0.975                     | 0.009                                  | 0.297                                               | 0.773                         | 0.263                 |
| Assam                 | Hailakandi                 | 0.610                        | 0.119                     | 0.174                                  | 0.435                                               | 0.734                         | 0.263                 |
| Assam                 | Sivasagar                  | 0.161                        | 0.222                     | 0.329                                  | 0.407                                               | 0.955                         | 0.266                 |
| Delhi                 | East                       | 0.030                        | 0.980                     | 0.100                                  | 0.430                                               | 0.537                         | 0.268                 |
| Tamil Nadu            | Perambalur                 | 0.338                        | 0.545                     | 0.626                                  | 0.056                                               | 0.513                         | 0.269                 |
| Rajasthan             | Bikaner                    | 0.457                        | 0.297                     | 0.366                                  | 0.628                                               | 0.332                         | 0.271                 |
| Tamil Nadu            | Nagapattinam               | 0.224                        | 0.779                     | 0.532                                  | 0.136                                               | 0.408                         | 0.271                 |
| Chhattisgarh          | Dakshin Bastar Dantewada   | 0.975                        | 0.044                     | 0.756                                  | 0.199                                               | 0.108                         | 0.274                 |
| Maharashtra           | Satara                     | 0.149                        | 0.670                     | 0.368                                  | 0.756                                               | 0.149                         | 0.275                 |
| Karnataka             | Bangalore Rural            | 0.252                        | 0.804                     | 0.463                                  | 0.272                                               | 0.305                         | 0.277                 |
| Nagaland              | Mon                        | 0.989                        | 0.171                     | 0.185                                  | 0.599                                               | 0.153                         | 0.277                 |
| Manipur               | Churachandpur              | 0.854                        | 0.059                     | 0.207                                  | 0.449                                               | 0.529                         | 0.280                 |
| Punjab                | Moga                       | 0.360                        | 0.775                     | 0.130                                  | 0.526                                               | 0.310                         | 0.282                 |
| Nagaland              | Longleng                   | 0.934                        | 0.247                     | 0.227                                  | 0.376                                               | 0.319                         | 0.283                 |
| Gujarat               | Surendranagar              | 0.455                        | 0.401                     | 0.737                                  | 0.257                                               | 0.254                         | 0.283                 |
| Maharashtra           | Gadchiroli                 | 0.725                        | 0.224                     | 0.415                                  | 0.282                                               | 0.471                         | 0.286                 |
| Karnataka             | Haveri                     | 0.552                        | 0.473                     | 0.682                                  | 0.236                                               | 0.174                         | 0.288                 |
| Delhi                 | North East                 | 0.072                        | 0.864                     | 0.131                                  | 0.510                                               | 0.545                         | 0.290                 |
| Mizoram               | Lunglei                    | 0.615                        | 0.433                     | 0.128                                  | 0.030                                               | 0.917                         | 0.291                 |
| Kerala                | Kollam                     | 0.016                        | 0.994                     | 0.028                                  | 0.189                                               | 0.897                         | 0.291                 |
| Kerala                | Ernakulam                  | 0.009                        | 0.997                     | 0.022                                  | 0.225                                               | 0.872                         | 0.294                 |
| Punjab                | Muktsar                    | 0.393                        | 0.717                     | 0.222                                  | 0.703                                               | 0.091                         | 0.294                 |
| Nagaland              | Tuensang                   | 0.964                        | 0.260                     | 0.177                                  | 0.413                                               | 0.313                         | 0.297                 |
| Rajasthan             | Jaisalmer                  | 0.911                        | 0.039                     | 0.829                                  | 0.291                                               | 0.056                         | 0.297                 |
| Maharashtra           | Chandrapur                 | 0.383                        | 0.739                     | 0.371                                  | 0.568                                               | 0.067                         | 0.300                 |
| Karnataka             | Hassan                     | 0.224                        | 0.743                     | 0.457                                  | 0.095                                               | 0.610                         | 0.302                 |
| Andhra Pradesh        | Anantapur                  | 0.352                        | 0.643                     | 0.471                                  | 0.261                                               | 0.405                         | 0.304                 |
| Tamil Nadu            | Chennai                    | 0.052                        | 0.878                     | 0.094                                  | 0.304                                               | 0.806                         | 0.304                 |
| Punjab                | Amritsar                   | 0.275                        | 0.858                     | 0.219                                  | 0.676                                               | 0.106                         | 0.307                 |

| State/Union Territory | District             | Socio-economic vulnerability | Demographic vulnerability | Vulnerability due to housing condition | Vulnerability due to non-availability of healthcare | Epidemiological vulnerability | Overall Vulnerability |
|-----------------------|----------------------|------------------------------|---------------------------|----------------------------------------|-----------------------------------------------------|-------------------------------|-----------------------|
| Lakshadweep           | Lakshadweep          | 0.266                        | 0.986                     | 0.038                                  | 0.241                                               | 0.604                         | 0.308                 |
| Odisha                | Nuapada              | 0.707                        | 0.102                     | 0.840                                  | 0.131                                               | 0.365                         | 0.310                 |
| Maharashtra           | Bhandara             | 0.293                        | 0.613                     | 0.266                                  | 0.493                                               | 0.482                         | 0.311                 |
| Karnataka             | Tumkur               | 0.463                        | 0.664                     | 0.648                                  | 0.174                                               | 0.200                         | 0.313                 |
| Tamil Nadu            | Krishnagiri          | 0.216                        | 0.319                     | 0.576                                  | 0.205                                               | 0.834                         | 0.315                 |
| Tamil Nadu            | Erode                | 0.081                        | 0.723                     | 0.297                                  | 0.166                                               | 0.883                         | 0.315                 |
| Karnataka             | Belgaum              | 0.282                        | 0.682                     | 0.598                                  | 0.477                                               | 0.114                         | 0.318                 |
| Karnataka             | Bellary              | 0.701                        | 0.429                     | 0.645                                  | 0.351                                               | 0.030                         | 0.319                 |
| Tamil Nadu            | Tiruchirappalli      | 0.094                        | 0.948                     | 0.444                                  | 0.252                                               | 0.418                         | 0.321                 |
| Maharashtra           | Amravati             | 0.349                        | 0.869                     | 0.355                                  | 0.557                                               | 0.027                         | 0.321                 |
| Manipur               | Imphal East          | 0.056                        | 0.862                     | 0.121                                  | 0.369                                               | 0.756                         | 0.324                 |
| Tamil Nadu            | Viluppuram           | 0.315                        | 0.322                     | 0.649                                  | 0.128                                               | 0.754                         | 0.326                 |
| Punjab                | Firozpur             | 0.424                        | 0.567                     | 0.139                                  | 0.803                                               | 0.239                         | 0.327                 |
| Haryana               | Sirsa                | 0.407                        | 0.576                     | 0.116                                  | 0.721                                               | 0.357                         | 0.329                 |
| Odisha                | Anugul               | 0.505                        | 0.228                     | 0.662                                  | 0.163                                               | 0.620                         | 0.330                 |
| Rajasthan             | Alwar                | 0.527                        | 0.275                     | 0.556                                  | 0.546                                               | 0.283                         | 0.332                 |
| Nagaland              | Zunheboto            | 0.837                        | 0.570                     | 0.272                                  | 0.207                                               | 0.302                         | 0.332                 |
| Tamil Nadu            | Kanniyakumari        | 0.006                        | 0.992                     | 0.041                                  | 0.402                                               | 0.746                         | 0.332                 |
| Puducherry            | Puducherry           | 0.077                        | 0.833                     | 0.316                                  | 0.264                                               | 0.704                         | 0.336                 |
| Gujarat               | Kachchh              | 0.674                        | 0.161                     | 0.501                                  | 0.358                                               | 0.501                         | 0.338                 |
| Maharashtra           | Ratnagiri            | 0.329                        | 0.496                     | 0.275                                  | 0.576                                               | 0.523                         | 0.340                 |
| Assam                 | Goalpara             | 0.734                        | 0.189                     | 0.302                                  | 0.294                                               | 0.681                         | 0.341                 |
| Haryana               | Kaithal              | 0.272                        | 0.729                     | 0.257                                  | 0.700                                               | 0.243                         | 0.343                 |
| Gujarat               | Tapi                 | 0.840                        | 0.255                     | 0.759                                  | 0.144                                               | 0.202                         | 0.343                 |
| Punjab                | Kapurthala           | 0.219                        | 0.939                     | 0.069                                  | 0.446                                               | 0.529                         | 0.346                 |
| Jammu and Kashmir     | Anantnag             | 0.358                        | 0.412                     | 0.058                                  | 0.545                                               | 0.833                         | 0.347                 |
| Uttar Pradesh         | Lucknow              | 0.239                        | 0.792                     | 0.352                                  | 0.756                                               | 0.069                         | 0.349                 |
| Mizoram               | Lawngtlai            | 0.955                        | 0.067                     | 0.423                                  | 0.146                                               | 0.624                         | 0.351                 |
| Goa                   | South Goa            | 0.031                        | 0.864                     | 0.202                                  | 0.532                                               | 0.585                         | 0.351                 |
| Rajasthan             | Pali                 | 0.607                        | 0.556                     | 0.545                                  | 0.166                                               | 0.341                         | 0.354                 |
| Mizoram               | Kolasib              | 0.673                        | 0.374                     | 0.197                                  | 0.008                                               | 0.966                         | 0.355                 |
| Punjab                | Gurdaspur            | 0.106                        | 0.926                     | 0.266                                  | 0.767                                               | 0.155                         | 0.357                 |
| Manipur               | Tamenglong           | 0.966                        | 0.072                     | 0.316                                  | 0.443                                               | 0.426                         | 0.358                 |
| Karnataka             | Gulbarga             | 0.510                        | 0.581                     | 0.703                                  | 0.435                                               | 0.000                         | 0.360                 |
| Tamil Nadu            | Pudukkottai          | 0.122                        | 0.676                     | 0.656                                  | 0.094                                               | 0.695                         | 0.362                 |
| Uttarakhand           | Nainital             | 0.222                        | 0.518                     | 0.192                                  | 0.459                                               | 0.856                         | 0.363                 |
| Meghalaya             | East Garo Hills      | 0.941                        | 0.030                     | 0.075                                  | 0.202                                               | 1.000                         | 0.363                 |
| Maharashtra           | Raigarh              | 0.114                        | 0.664                     | 0.288                                  | 0.797                                               | 0.388                         | 0.366                 |
| Rajasthan             | Nagaur               | 0.631                        | 0.427                     | 0.524                                  | 0.310                                               | 0.365                         | 0.368                 |
| Assam                 | Morigaon             | 0.646                        | 0.152                     | 0.363                                  | 0.257                                               | 0.844                         | 0.369                 |
| Gujarat               | Bhavnagar            | 0.174                        | 0.549                     | 0.521                                  | 0.570                                               | 0.449                         | 0.371                 |
| Assam                 | Karimganj            | 0.606                        | 0.155                     | 0.232                                  | 0.696                                               | 0.574                         | 0.371                 |
| Gujarat               | Patan                | 0.654                        | 0.382                     | 0.736                                  | 0.218                                               | 0.274                         | 0.371                 |
| Chhattisgarh          | Korba                | 0.524                        | 0.261                     | 0.651                                  | 0.421                                               | 0.408                         | 0.376                 |
| Tripura               | South Tripura        | 0.712                        | 0.142                     | 0.332                                  | 0.091                                               | 0.991                         | 0.377                 |
| Rajasthan             | Jaipur               | 0.302                        | 0.618                     | 0.351                                  | 0.560                                               | 0.441                         | 0.379                 |
| Tripura               | Dhalai               | 0.900                        | 0.070                     | 0.496                                  | 0.031                                               | 0.775                         | 0.379                 |
| Assam                 | Dima Hasao           | 0.884                        | 0.121                     | 0.412                                  | 0.296                                               | 0.562                         | 0.382                 |
| Chhattisgarh          | Narayanpur           | 0.890                        | 0.022                     | 0.879                                  | 0.045                                               | 0.440                         | 0.383                 |
| Delhi                 | South                | 0.056                        | 0.859                     | 0.199                                  | 0.571                                               | 0.593                         | 0.385                 |
| Uttarakhand           | Pithoragarh          | 0.490                        | 0.407                     | 0.254                                  | 0.363                                               | 0.765                         | 0.385                 |
| Dadra & Nagar Haveli  | Dadra & Nagar Haveli | 0.692                        | 0.454                     | 0.728                                  | 0.218                                               | 0.188                         | 0.385                 |
| Odisha                | Balangir             | 0.640                        | 0.351                     | 0.869                                  | 0.166                                               | 0.258                         | 0.390                 |
| Rajasthan             | Hanumangarh          | 0.623                        | 0.413                     | 0.332                                  | 0.623                                               | 0.297                         | 0.391                 |
| Chhattisgarh          | Bijapur              | 0.739                        | 0.006                     | 0.656                                  | 0.023                                               | 0.864                         | 0.391                 |
| Odisha                | Debagarh             | 0.825                        | 0.124                     | 0.781                                  | 0.106                                               | 0.455                         | 0.394                 |
| Maharashtra           | Mumbai               | 0.092                        | 0.951                     | 0.299                                  | 0.340                                               | 0.609                         | 0.394                 |
| Assam                 | Dhemaji              | 0.635                        | 0.027                     | 0.419                                  | 0.584                                               | 0.629                         | 0.397                 |
| West Bengal           | Purba Medinipur      | 0.131                        | 0.640                     | 0.441                                  | 0.637                                               | 0.446                         | 0.399                 |
| Jammu and Kashmir     | Bandipore            | 0.421                        | 0.421                     | 0.080                                  | 0.488                                               | 0.887                         | 0.401                 |
| Jammu and Kashmir     | Kulgam               | 0.459                        | 0.574                     | 0.072                                  | 0.355                                               | 0.839                         | 0.402                 |
| Punjab                | Ludhiana             | 0.138                        | 0.961                     | 0.059                                  | 0.689                                               | 0.468                         | 0.404                 |
| Tamil Nadu            | Thanjavur            | 0.156                        | 0.942                     | 0.397                                  | 0.152                                               | 0.668                         | 0.405                 |
| Gujarat               | Anand                | 0.053                        | 0.930                     | 0.485                                  | 0.484                                               | 0.369                         | 0.407                 |
| Nagaland              | Kohima               | 0.684                        | 0.365                     | 0.031                                  | 0.576                                               | 0.667                         | 0.408                 |
| Manipur               | Imphal West          | 0.025                        | 0.941                     | 0.091                                  | 0.391                                               | 0.876                         | 0.410                 |
| Tamil Nadu            | Kancheepuram         | 0.155                        | 0.784                     | 0.336                                  | 0.515                                               | 0.535                         | 0.412                 |
| Tamil Nadu            | Madurai              | 0.036                        | 0.942                     | 0.358                                  | 0.315                                               | 0.679                         | 0.413                 |

|                   |                           |       |       |       |       |       |       |
|-------------------|---------------------------|-------|-------|-------|-------|-------|-------|
| Arunachal Pradesh | East Kameng               | 0.997 | 0.066 | 0.690 | 0.013 | 0.570 | 0.415 |
| Tamil Nadu        | Ramanathapuram            | 0.067 | 0.751 | 0.546 | 0.188 | 0.782 | 0.415 |
| Chhattisgarh      | Raipur                    | 0.332 | 0.535 | 0.612 | 0.723 | 0.135 | 0.418 |
| Gujarat           | Rajkot                    | 0.050 | 0.908 | 0.349 | 0.515 | 0.518 | 0.419 |
| Punjab            | Rupnagar                  | 0.103 | 0.872 | 0.103 | 0.645 | 0.620 | 0.421 |
| Rajasthan         | Rajsamand                 | 0.743 | 0.394 | 0.618 | 0.382 | 0.211 | 0.423 |
| Tamil Nadu        | Thiruvallur               | 0.088 | 0.753 | 0.261 | 0.412 | 0.842 | 0.424 |
| Maharashtra       | Sangli                    | 0.135 | 0.811 | 0.376 | 0.770 | 0.266 | 0.426 |
| Karnataka         | Dharwad                   | 0.185 | 0.837 | 0.684 | 0.595 | 0.056 | 0.426 |
| Jammu and Kashmir | Srinagar                  | 0.039 | 0.958 | 0.005 | 0.543 | 0.817 | 0.429 |
| Rajasthan         | Bhilwara                  | 0.595 | 0.535 | 0.725 | 0.365 | 0.142 | 0.429 |
| Haryana           | Rewari                    | 0.125 | 0.898 | 0.354 | 0.673 | 0.311 | 0.429 |
| Tamil Nadu        | Theni                     | 0.152 | 0.884 | 0.432 | 0.177 | 0.718 | 0.433 |
| Punjab            | Shahid Bhagat Singh Nagar | 0.194 | 0.936 | 0.124 | 0.538 | 0.573 | 0.435 |
| Chhattisgarh      | Bilaspur                  | 0.460 | 0.232 | 0.685 | 0.531 | 0.459 | 0.437 |
| Manipur           | Ukhrul                    | 0.815 | 0.150 | 0.175 | 0.474 | 0.757 | 0.438 |
| Haryana           | Jind                      | 0.249 | 0.524 | 0.274 | 0.726 | 0.599 | 0.438 |
| Karnataka         | Bagalkot                  | 0.523 | 0.687 | 0.762 | 0.387 | 0.022 | 0.441 |
| Punjab            | Mansa                     | 0.482 | 0.764 | 0.178 | 0.512 | 0.444 | 0.441 |
| West Bengal       | Koch Bihar                | 0.751 | 0.296 | 0.236 | 0.347 | 0.751 | 0.444 |
| Gujarat           | Bharuch                   | 0.474 | 0.695 | 0.454 | 0.347 | 0.413 | 0.446 |
| Jharkhand         | Latehar                   | 0.955 | 0.094 | 0.894 | 0.402 | 0.041 | 0.448 |
| Tamil Nadu        | Cuddalore                 | 0.261 | 0.879 | 0.498 | 0.228 | 0.529 | 0.449 |
| Chhattisgarh      | Kabirdham                 | 0.817 | 0.086 | 0.897 | 0.518 | 0.081 | 0.451 |
| Jammu and Kashmir | Kupwara                   | 0.487 | 0.332 | 0.160 | 0.537 | 0.887 | 0.452 |
| Andhra Pradesh    | Chittoor                  | 0.280 | 0.770 | 0.507 | 0.433 | 0.413 | 0.454 |
| Gujarat           | Valsad                    | 0.495 | 0.726 | 0.613 | 0.457 | 0.122 | 0.455 |
| Jammu and Kashmir | Jammu                     | 0.139 | 0.937 | 0.260 | 0.335 | 0.743 | 0.457 |
| Chhattisgarh      | Raigarh                   | 0.649 | 0.308 | 0.801 | 0.230 | 0.427 | 0.459 |
| Jammu and Kashmir | Kathua                    | 0.316 | 0.419 | 0.551 | 0.482 | 0.654 | 0.460 |
| Jammu and Kashmir | Punch                     | 0.782 | 0.064 | 0.568 | 0.336 | 0.673 | 0.462 |
| Chhattisgarh      | Janjgir - Champa          | 0.535 | 0.499 | 0.839 | 0.495 | 0.059 | 0.463 |
| Uttar Pradesh     | Kushinagar                | 0.449 | 0.371 | 0.642 | 0.585 | 0.380 | 0.463 |
| Odisha            | Kandhamal                 | 0.958 | 0.110 | 0.987 | 0.028 | 0.349 | 0.466 |
| Rajasthan         | Kota                      | 0.397 | 0.692 | 0.509 | 0.452 | 0.382 | 0.466 |
| Rajasthan         | Jalor                     | 0.922 | 0.077 | 0.864 | 0.567 | 0.006 | 0.469 |
| Chhattisgarh      | Mahasamund                | 0.582 | 0.258 | 0.822 | 0.424 | 0.351 | 0.471 |
| Odisha            | Kalahandi                 | 0.911 | 0.299 | 0.912 | 0.114 | 0.207 | 0.473 |
| Assam             | Kamrup Metropolitan       | 0.207 | 0.886 | 0.102 | 0.540 | 0.710 | 0.474 |
| Rajasthan         | Sirohi                    | 0.942 | 0.286 | 0.815 | 0.333 | 0.072 | 0.476 |
| Chhattisgarh      | Surgeja                   | 0.923 | 0.083 | 0.850 | 0.452 | 0.146 | 0.477 |
| West Bengal       | Darjiling                 | 0.432 | 0.745 | 0.291 | 0.429 | 0.559 | 0.479 |
| Madhya Pradesh    | Morena                    | 0.412 | 0.595 | 0.571 | 0.817 | 0.061 | 0.479 |
| Assam             | Tinsukia                  | 0.477 | 0.200 | 0.346 | 0.681 | 0.753 | 0.482 |
| Tamil Nadu        | Sivaganga                 | 0.099 | 0.900 | 0.376 | 0.171 | 0.912 | 0.482 |
| Maharashtra       | Ahmadnagar                | 0.402 | 0.656 | 0.618 | 0.765 | 0.017 | 0.485 |
| Andhra Pradesh    | Y.S.R.                    | 0.188 | 0.781 | 0.427 | 0.338 | 0.725 | 0.485 |
| Telangana         | Hyderabad                 | 0.078 | 0.844 | 0.258 | 0.571 | 0.717 | 0.488 |
| Tamil Nadu        | Tirunelveli               | 0.196 | 0.967 | 0.416 | 0.216 | 0.673 | 0.488 |
| Maharashtra       | Nashik                    | 0.380 | 0.736 | 0.501 | 0.704 | 0.147 | 0.488 |
| Gujarat           | The Dangs                 | 0.972 | 0.014 | 0.969 | 0.116 | 0.399 | 0.493 |
| Tripura           | North Tripura             | 0.844 | 0.324 | 0.451 | 0.150 | 0.706 | 0.495 |
| Uttarakhand       | Hardwar                   | 0.423 | 0.579 | 0.405 | 0.746 | 0.321 | 0.495 |
| Odisha            | Sambalpur                 | 0.617 | 0.540 | 0.775 | 0.089 | 0.454 | 0.495 |
| Assam             | Cachar                    | 0.576 | 0.203 | 0.332 | 0.679 | 0.684 | 0.495 |
| Maharashtra       | Pune                      | 0.171 | 0.837 | 0.290 | 0.690 | 0.493 | 0.501 |
| Nagaland          | Mokokchung                | 0.628 | 0.698 | 0.008 | 0.322 | 0.825 | 0.501 |
| Odisha            | Dhenkanal                 | 0.482 | 0.440 | 0.712 | 0.081 | 0.768 | 0.504 |
| Chhattisgarh      | Durg                      | 0.210 | 0.604 | 0.582 | 0.715 | 0.372 | 0.505 |
| Gujarat           | Narmada                   | 0.895 | 0.111 | 0.806 | 0.131 | 0.548 | 0.507 |
| Odisha            | Jagatsinghapur            | 0.156 | 0.759 | 0.617 | 0.147 | 0.815 | 0.509 |
| Delhi             | North                     | 0.070 | 0.847 | 0.214 | 0.397 | 0.967 | 0.510 |
| Manipur           | Bishnupur                 | 0.069 | 0.919 | 0.188 | 0.418 | 0.903 | 0.510 |
| Jammu and Kashmir | Rajouri                   | 0.740 | 0.058 | 0.593 | 0.324 | 0.781 | 0.513 |
| Punjab            | Bathinda                  | 0.257 | 0.876 | 0.074 | 0.629 | 0.668 | 0.515 |
| Andhra Pradesh    | Kurnool                   | 0.493 | 0.407 | 0.628 | 0.399 | 0.582 | 0.516 |
| Telangana         | Rangareddy                | 0.136 | 0.764 | 0.316 | 0.746 | 0.546 | 0.516 |
| Tamil Nadu        | Thiruvarur                | 0.230 | 0.712 | 0.571 | 0.088 | 0.909 | 0.520 |

| State/Union Territory | District                             | Socio-economic vulnerability | Demographic vulnerability | Vulnerability due to housing condition | Vulnerability due to non-availability of healthcare | Epidemiological vulnerability | Overall Vulnerability |
|-----------------------|--------------------------------------|------------------------------|---------------------------|----------------------------------------|-----------------------------------------------------|-------------------------------|-----------------------|
| Haryana               | Jhajjar                              | 0.113                        | 0.853                     | 0.158                                  | 0.604                                               | 0.784                         | 0.521                 |
| Chhattisgarh          | Jashpur                              | 0.886                        | 0.172                     | 0.934                                  | 0.072                                               | 0.448                         | 0.521                 |
| West Bengal           | Kolkata                              | 0.160                        | 0.978                     | 0.210                                  | 0.210                                               | 0.956                         | 0.524                 |
| Rajasthan             | Pratapgarh                           | 0.978                        | 0.100                     | 1.000                                  | 0.371                                               | 0.077                         | 0.526                 |
| Madhya Pradesh        | Datia                                | 0.502                        | 0.563                     | 0.474                                  | 0.803                                               | 0.186                         | 0.527                 |
| Karnataka             | Chikkaballapura                      | 0.692                        | 0.676                     | 0.651                                  | 0.274                                               | 0.238                         | 0.529                 |
| Jammu and Kashmir     | Reasi                                | 0.781                        | 0.016                     | 0.695                                  | 0.351                                               | 0.689                         | 0.529                 |
| Gujarat               | Ahmadabad                            | 0.033                        | 0.981                     | 0.246                                  | 0.640                                               | 0.634                         | 0.532                 |
| Odisha                | Sundargarh                           | 0.435                        | 0.482                     | 0.593                                  | 0.288                                               | 0.739                         | 0.534                 |
| Karnataka             | Yadgir                               | 0.947                        | 0.269                     | 0.994                                  | 0.319                                               | 0.011                         | 0.535                 |
| Maharashtra           | Wardha                               | 0.277                        | 0.867                     | 0.360                                  | 0.626                                               | 0.412                         | 0.537                 |
| Maharashtra           | Kolhapur                             | 0.119                        | 0.962                     | 0.255                                  | 0.792                                               | 0.416                         | 0.538                 |
| Odisha                | Bhadrak                              | 0.372                        | 0.216                     | 0.864                                  | 0.182                                               | 0.912                         | 0.540                 |
| Assam                 | Dhubri                               | 0.657                        | 0.221                     | 0.372                                  | 0.613                                               | 0.689                         | 0.541                 |
| Jharkhand             | Lohardaga                            | 0.784                        | 0.285                     | 0.701                                  | 0.643                                               | 0.139                         | 0.541                 |
| Rajasthan             | Dungarpur                            | 0.973                        | 0.264                     | 0.862                                  | 0.416                                               | 0.039                         | 0.545                 |
| Andhra Pradesh        | Visakhapatnam                        | 0.332                        | 0.809                     | 0.474                                  | 0.371                                               | 0.571                         | 0.546                 |
| Manipur               | Thoubal                              | 0.105                        | 0.901                     | 0.250                                  | 0.468                                               | 0.836                         | 0.548                 |
| Tamil Nadu            | Virudhunagar                         | 0.208                        | 0.953                     | 0.513                                  | 0.286                                               | 0.603                         | 0.549                 |
| Maharashtra           | Thane                                | 0.247                        | 0.845                     | 0.532                                  | 0.854                                               | 0.086                         | 0.551                 |
| Odisha                | Nayagarh                             | 0.346                        | 0.380                     | 0.808                                  | 0.058                                               | 0.975                         | 0.552                 |
| Madhya Pradesh        | Bhind                                | 0.308                        | 0.734                     | 0.563                                  | 0.786                                               | 0.180                         | 0.554                 |
| Andhra Pradesh        | Sri Potti Sriramulu Nellore          | 0.495                        | 0.657                     | 0.576                                  | 0.299                                               | 0.549                         | 0.556                 |
| Odisha                | Puri                                 | 0.124                        | 0.746                     | 0.640                                  | 0.127                                               | 0.947                         | 0.557                 |
| Madhya Pradesh        | Burhanpur                            | 0.715                        | 0.443                     | 0.624                                  | 0.541                                               | 0.261                         | 0.559                 |
| Uttar Pradesh         | Farrukhabad                          | 0.387                        | 0.593                     | 0.687                                  | 0.850                                               | 0.074                         | 0.560                 |
| Gujarat               | Surat                                | 0.183                        | 0.822                     | 0.341                                  | 0.607                                               | 0.638                         | 0.562                 |
| Rajasthan             | Tonk                                 | 0.776                        | 0.659                     | 0.732                                  | 0.269                                               | 0.156                         | 0.563                 |
| Bihar                 | Arwal                                | 0.762                        | 0.643                     | 0.565                                  | 0.562                                               | 0.063                         | 0.565                 |
| Madhya Pradesh        | Hoshangabad                          | 0.437                        | 0.336                     | 0.408                                  | 0.693                                               | 0.720                         | 0.565                 |
| Tripura               | West Tripura                         | 0.405                        | 0.754                     | 0.136                                  | 0.368                                               | 0.936                         | 0.568                 |
| West Bengal           | Murshidabad                          | 0.487                        | 0.590                     | 0.495                                  | 0.598                                               | 0.435                         | 0.570                 |
| Gujarat               | Kheda                                | 0.343                        | 0.768                     | 0.850                                  | 0.435                                               | 0.211                         | 0.571                 |
| Andhra Pradesh        | Srikakulam                           | 0.401                        | 0.721                     | 0.728                                  | 0.208                                               | 0.551                         | 0.573                 |
| Tamil Nadu            | Coimbatore                           | 0.192                        | 0.931                     | 0.343                                  | 0.307                                               | 0.844                         | 0.574                 |
| Gujarat               | Banaskantha                          | 0.700                        | 0.180                     | 0.901                                  | 0.299                                               | 0.537                         | 0.574                 |
| Karnataka             | Raichur                              | 0.881                        | 0.257                     | 0.886                                  | 0.534                                               | 0.066                         | 0.577                 |
| Karnataka             | Chamarajanagar                       | 0.826                        | 0.520                     | 0.654                                  | 0.158                                               | 0.466                         | 0.579                 |
| Maharashtra           | Jalgaon                              | 0.243                        | 0.894                     | 0.554                                  | 0.754                                               | 0.183                         | 0.581                 |
| Andhra Pradesh        | West Godavari                        | 0.335                        | 0.828                     | 0.277                                  | 0.360                                               | 0.829                         | 0.582                 |
| Madhya Pradesh        | Neemuch                              | 0.557                        | 0.393                     | 0.665                                  | 0.753                                               | 0.263                         | 0.584                 |
| Odisha                | Rayagada                             | 0.970                        | 0.139                     | 0.814                                  | 0.067                                               | 0.642                         | 0.585                 |
| Bihar                 | Aurangabad                           | 0.665                        | 0.488                     | 0.493                                  | 0.629                                               | 0.360                         | 0.587                 |
| Karnataka             | Bidar                                | 0.612                        | 0.728                     | 0.784                                  | 0.355                                               | 0.156                         | 0.588                 |
| Rajasthan             | Banswara                             | 0.987                        | 0.146                     | 0.992                                  | 0.507                                               | 0.005                         | 0.590                 |
| Uttar Pradesh         | Jhansi                               | 0.349                        | 0.873                     | 0.455                                  | 0.782                                               | 0.178                         | 0.592                 |
| Manipur               | Chandel                              | 0.881                        | 0.044                     | 0.263                                  | 0.534                                               | 0.922                         | 0.593                 |
| Uttar Pradesh         | Rampur                               | 0.510                        | 0.484                     | 0.487                                  | 0.955                                               | 0.210                         | 0.595                 |
| Telangana             | Nalgonda                             | 0.646                        | 0.612                     | 0.423                                  | 0.377                                               | 0.590                         | 0.596                 |
| Karnataka             | Chitradurga                          | 0.599                        | 0.532                     | 0.764                                  | 0.177                                               | 0.581                         | 0.598                 |
| Bihar                 | Rohtas                               | 0.582                        | 0.480                     | 0.581                                  | 0.859                                               | 0.166                         | 0.599                 |
| Gujarat               | Jamnagar                             | 0.177                        | 0.693                     | 0.474                                  | 0.548                                               | 0.776                         | 0.599                 |
| Andhra Pradesh        | Prakasam                             | 0.703                        | 0.504                     | 0.512                                  | 0.321                                               | 0.632                         | 0.603                 |
| Rajasthan             | Chittaurgarh                         | 0.745                        | 0.443                     | 0.808                                  | 0.520                                               | 0.156                         | 0.603                 |
| Manipur               | Senapati (Excluding 3 Sub-Divisions) | 0.861                        | 0.016                     | 0.203                                  | 0.637                                               | 0.962                         | 0.606                 |
| Uttar Pradesh         | Jalaun                               | 0.372                        | 0.759                     | 0.440                                  | 0.840                                               | 0.268                         | 0.606                 |
| Maharashtra           | Solapur                              | 0.354                        | 0.892                     | 0.446                                  | 0.707                                               | 0.290                         | 0.609                 |
| Madhya Pradesh        | Sehore                               | 0.507                        | 0.493                     | 0.449                                  | 0.729                                               | 0.512                         | 0.610                 |
| Odisha                | Khordha                              | 0.047                        | 0.956                     | 0.560                                  | 0.255                                               | 0.873                         | 0.612                 |
| Jharkhand             | Khunti                               | 0.872                        | 0.254                     | 0.811                                  | 0.706                                               | 0.052                         | 0.613                 |
| Bihar                 | Bhojpur                              | 0.498                        | 0.703                     | 0.516                                  | 0.901                                               | 0.075                         | 0.613                 |
| Uttar Pradesh         | Deoria                               | 0.346                        | 0.610                     | 0.592                                  | 0.889                                               | 0.257                         | 0.613                 |
| Jammu and Kashmir     | Samba                                | 0.377                        | 0.582                     | 0.448                                  | 0.502                                               | 0.786                         | 0.618                 |
| Jammu and Kashmir     | Udhampur                             | 0.642                        | 0.263                     | 0.698                                  | 0.476                                               | 0.618                         | 0.620                 |
| Jammu and Kashmir     | Kishtwar                             | 0.618                        | 0.135                     | 0.562                                  | 0.499                                               | 0.883                         | 0.620                 |

| State/Union Territory | District                   | Socio-economic vulnerability | Demographic vulnerability | Vulnerability due to housing condition | Vulnerability due to non-availability of healthcare | Epidemiological vulnerability | Overall Vulnerability |
|-----------------------|----------------------------|------------------------------|---------------------------|----------------------------------------|-----------------------------------------------------|-------------------------------|-----------------------|
| Karnataka             | Bijapur                    | 0.660                        | 0.479                     | 0.950                                  | 0.501                                               | 0.110                         | 0.623                 |
| Uttar Pradesh         | Kanpur Nagar               | 0.110                        | 0.908                     | 0.383                                  | 0.839                                               | 0.460                         | 0.623                 |
| Madhya Pradesh        | Mandla                     | 0.950                        | 0.081                     | 0.870                                  | 0.396                                               | 0.404                         | 0.626                 |
| Madhya Pradesh        | Guna                       | 0.801                        | 0.232                     | 0.828                                  | 0.710                                               | 0.138                         | 0.628                 |
| Odisha                | Jharsuguda                 | 0.321                        | 0.674                     | 0.610                                  | 0.246                                               | 0.858                         | 0.628                 |
| Uttar Pradesh         | Ghaziabad                  | 0.235                        | 0.662                     | 0.357                                  | 0.969                                               | 0.488                         | 0.631                 |
| J&K                   | Doda                       | 0.603                        | 0.041                     | 0.631                                  | 0.579                                               | 0.861                         | 0.632                 |
| Karnataka             | Mysore                     | 0.290                        | 0.842                     | 0.535                                  | 0.332                                               | 0.715                         | 0.632                 |
| Rajasthan             | Barmer                     | 0.870                        | 0.085                     | 0.986                                  | 0.587                                               | 0.189                         | 0.635                 |
| Nagaland              | Dimapur                    | 0.541                        | 0.349                     | 0.141                                  | 0.701                                               | 0.984                         | 0.635                 |
| Odisha                | Subarnapur                 | 0.590                        | 0.415                     | 0.980                                  | 0.069                                               | 0.668                         | 0.638                 |
| Uttarakhand           | Champawat                  | 0.462                        | 0.351                     | 0.399                                  | 0.610                                               | 0.901                         | 0.640                 |
| Andhra Pradesh        | East Godavari              | 0.354                        | 0.720                     | 0.515                                  | 0.344                                               | 0.790                         | 0.642                 |
| Karnataka             | Bangalore                  | 0.049                        | 0.906                     | 0.088                                  | 0.775                                               | 0.906                         | 0.642                 |
| Rajasthan             | Jhalawar                   | 0.898                        | 0.432                     | 0.864                                  | 0.432                                               | 0.099                         | 0.645                 |
| Madhya Pradesh        | Raisen                     | 0.676                        | 0.236                     | 0.679                                  | 0.623                                               | 0.515                         | 0.646                 |
| Jharkhand             | Kodarma                    | 0.532                        | 0.369                     | 0.751                                  | 1.000                                               | 0.080                         | 0.648                 |
| Uttar Pradesh         | Gautam Buddha Nagar        | 0.191                        | 0.599                     | 0.330                                  | 0.881                                               | 0.736                         | 0.649                 |
| Madhya Pradesh        | Ashoknagar                 | 0.817                        | 0.196                     | 0.723                                  | 0.773                                               | 0.232                         | 0.651                 |
| Jharkhand             | Hazaribagh                 | 0.653                        | 0.277                     | 0.725                                  | 0.881                                               | 0.230                         | 0.653                 |
| Odisha                | Ganjam                     | 0.659                        | 0.815                     | 0.632                                  | 0.225                                               | 0.437                         | 0.654                 |
| Maharashtra           | Hingoli                    | 0.695                        | 0.545                     | 0.570                                  | 0.781                                               | 0.182                         | 0.656                 |
| Odisha                | Jajapur                    | 0.310                        | 0.582                     | 0.779                                  | 0.117                                               | 0.983                         | 0.656                 |
| Rajasthan             | Dhaulpur                   | 0.764                        | 0.299                     | 0.936                                  | 0.451                                               | 0.322                         | 0.656                 |
| Jharkhand             | Simdega                    | 0.909                        | 0.167                     | 0.765                                  | 0.698                                               | 0.233                         | 0.660                 |
| Andhra Pradesh        | Krishna                    | 0.294                        | 0.912                     | 0.408                                  | 0.460                                               | 0.707                         | 0.662                 |
| Maharashtra           | Mumbai Suburban            | 0.074                        | 0.817                     | 0.363                                  | 0.734                                               | 0.797                         | 0.664                 |
| Bihar                 | Kaimur (Bhabua)            | 0.790                        | 0.344                     | 0.623                                  | 0.814                                               | 0.216                         | 0.665                 |
| Tamil Nadu            | Thoothukkudi               | 0.211                        | 0.955                     | 0.437                                  | 0.305                                               | 0.881                         | 0.667                 |
| Odisha                | Kendrapara                 | 0.362                        | 0.562                     | 0.833                                  | 0.164                                               | 0.870                         | 0.668                 |
| Rajasthan             | Udaipur                    | 0.961                        | 0.446                     | 0.941                                  | 0.346                                               | 0.099                         | 0.670                 |
| Nagaland              | Peren                      | 0.939                        | 0.133                     | 0.271                                  | 0.465                                               | 0.994                         | 0.671                 |
| Madhya Pradesh        | Gwalior                    | 0.396                        | 0.653                     | 0.430                                  | 0.864                                               | 0.462                         | 0.673                 |
| Uttar Pradesh         | Mahoba                     | 0.649                        | 0.615                     | 0.598                                  | 0.732                                               | 0.211                         | 0.674                 |
| Uttar Pradesh         | Sultanpur                  | 0.469                        | 0.377                     | 0.887                                  | 0.962                                               | 0.119                         | 0.676                 |
| Uttar Pradesh         | Mainpuri                   | 0.272                        | 0.673                     | 0.848                                  | 0.853                                               | 0.171                         | 0.678                 |
| Odisha                | Malkangiri                 | 0.969                        | 0.028                     | 0.972                                  | 0.044                                               | 0.809                         | 0.679                 |
| Uttar Pradesh         | Baghpat                    | 0.246                        | 0.808                     | 0.451                                  | 0.895                                               | 0.424                         | 0.681                 |
| Odisha                | Koraput                    | 0.981                        | 0.175                     | 0.897                                  | 0.085                                               | 0.685                         | 0.681                 |
| Madhya Pradesh        | Indore                     | 0.202                        | 0.829                     | 0.122                                  | 0.894                                               | 0.776                         | 0.681                 |
| Uttar Pradesh         | Jyotiba Phule Nagar        | 0.545                        | 0.501                     | 0.538                                  | 0.948                                               | 0.294                         | 0.685                 |
| Maharashtra           | Aurangabad                 | 0.288                        | 0.790                     | 0.643                                  | 0.795                                               | 0.313                         | 0.687                 |
| Uttar Pradesh         | Banda                      | 0.579                        | 0.485                     | 0.628                                  | 0.890                                               | 0.250                         | 0.689                 |
| Madhya Pradesh        | Bhopal                     | 0.130                        | 0.787                     | 0.241                                  | 0.745                                               | 0.936                         | 0.690                 |
| Madhya Pradesh        | Shajapur                   | 0.618                        | 0.438                     | 0.504                                  | 0.900                                               | 0.379                         | 0.690                 |
| Jharkhand             | Giridih                    | 0.800                        | 0.318                     | 0.826                                  | 0.906                                               | 0.003                         | 0.693                 |
| Maharashtra           | Latur                      | 0.531                        | 0.879                     | 0.659                                  | 0.632                                               | 0.161                         | 0.695                 |
| Jharkhand             | Ramgarh                    | 0.557                        | 0.698                     | 0.582                                  | 0.761                                               | 0.268                         | 0.696                 |
| Rajasthan             | Bundi                      | 0.858                        | 0.490                     | 0.905                                  | 0.523                                               | 0.092                         | 0.698                 |
| Maharashtra           | Osmanabad                  | 0.322                        | 0.538                     | 0.754                                  | 0.737                                               | 0.518                         | 0.700                 |
| Madhya Pradesh        | Dindori                    | 0.977                        | 0.011                     | 0.958                                  | 0.327                                               | 0.601                         | 0.701                 |
| Jharkhand             | Purbi Singhbhum            | 0.465                        | 0.911                     | 0.588                                  | 0.870                                               | 0.042                         | 0.703                 |
| Maharashtra           | Akola                      | 0.329                        | 0.890                     | 0.491                                  | 0.670                                               | 0.499                         | 0.704                 |
| Uttar Pradesh         | Basti                      | 0.443                        | 0.469                     | 0.845                                  | 0.836                                               | 0.290                         | 0.706                 |
| Andhra Pradesh        | Vizianagaram               | 0.563                        | 0.646                     | 0.674                                  | 0.203                                               | 0.800                         | 0.707                 |
| Uttar Pradesh         | Agra                       | 0.368                        | 0.689                     | 0.559                                  | 0.928                                               | 0.346                         | 0.709                 |
| Jharkhand             | Jamtara                    | 0.795                        | 0.305                     | 0.945                                  | 0.770                                               | 0.081                         | 0.710                 |
| Odisha                | Nabarangapur               | 0.928                        | 0.069                     | 0.966                                  | 0.105                                               | 0.829                         | 0.712                 |
| Telangana             | Nizamabad                  | 0.574                        | 0.706                     | 0.480                                  | 0.424                                               | 0.723                         | 0.714                 |
| West Bengal           | North Twenty Four Parganas | 0.250                        | 0.947                     | 0.224                                  | 0.507                                               | 0.986                         | 0.715                 |
| Odisha                | Mayurbhanj                 | 0.808                        | 0.228                     | 0.894                                  | 0.149                                               | 0.840                         | 0.717                 |
| Odisha                | Baleswar                   | 0.419                        | 0.646                     | 0.709                                  | 0.244                                               | 0.905                         | 0.718                 |
| Jammu and Kashmir     | Ramban                     | 0.712                        | 0.034                     | 0.740                                  | 0.513                                               | 0.925                         | 0.720                 |
| Odisha                | Cuttack                    | 0.117                        | 0.922                     | 0.678                                  | 0.274                                               | 0.941                         | 0.721                 |
| Bihar                 | Siwan                      | 0.613                        | 0.682                     | 0.720                                  | 0.809                                               | 0.111                         | 0.723                 |
| Bihar                 | Jehanabad                  | 0.734                        | 0.782                     | 0.499                                  | 0.574                                               | 0.351                         | 0.725                 |
| Andhra Pradesh        | Guntur                     | 0.391                        | 0.894                     | 0.429                                  | 0.410                                               | 0.820                         | 0.726                 |
| Maharashtra           | Yavatmal                   | 0.638                        | 0.554                     | 0.465                                  | 0.723                                               | 0.568                         | 0.728                 |



| State/Union Territory | District              | Socio-economic vulnerability | Demographic vulnerability | Vulnerability due to housing condition | Vulnerability due to non-availability of healthcare | Epidemiological vulnerability | Overall Vulnerability |
|-----------------------|-----------------------|------------------------------|---------------------------|----------------------------------------|-----------------------------------------------------|-------------------------------|-----------------------|
| Madhya Pradesh        | Sheopur               | 0.926                        | 0.074                     | 0.955                                  | 0.726                                               | 0.280                         | 0.729                 |
| Uttar Pradesh         | Firozabad             | 0.340                        | 0.773                     | 0.618                                  | 0.844                                               | 0.388                         | 0.731                 |
| West Bengal           | Bankura               | 0.645                        | 0.421                     | 0.815                                  | 0.362                                               | 0.721                         | 0.732                 |
| Madhya Pradesh        | Harda                 | 0.873                        | 0.219                     | 0.537                                  | 0.750                                               | 0.588                         | 0.734                 |
| Uttar Pradesh         | Chandauli             | 0.438                        | 0.468                     | 0.850                                  | 0.925                                               | 0.290                         | 0.736                 |
| Rajasthan             | Dausa                 | 0.811                        | 0.516                     | 0.770                                  | 0.401                                               | 0.477                         | 0.737                 |
| Bihar                 | Madhepura             | 0.839                        | 0.326                     | 0.743                                  | 0.825                                               | 0.247                         | 0.739                 |
| Maharashtra           | Nandurbar             | 0.980                        | 0.207                     | 0.942                                  | 0.603                                               | 0.254                         | 0.740                 |
| Telangana             | Medak                 | 0.671                        | 0.725                     | 0.418                                  | 0.343                                               | 0.828                         | 0.740                 |
| Uttar Pradesh         | Bulandshahr           | 0.429                        | 0.606                     | 0.523                                  | 0.941                                               | 0.495                         | 0.743                 |
| Uttar Pradesh         | Ballia                | 0.451                        | 0.466                     | 0.734                                  | 0.861                                               | 0.484                         | 0.745                 |
| Madhya Pradesh        | Rajgarh               | 0.695                        | 0.540                     | 0.925                                  | 0.710                                               | 0.125                         | 0.745                 |
| Maharashtra           | Washim                | 0.577                        | 0.629                     | 0.490                                  | 0.740                                               | 0.567                         | 0.748                 |
| Madhya Pradesh        | Balaghat              | 0.468                        | 0.236                     | 0.748                                  | 0.750                                               | 0.803                         | 0.750                 |
| Telangana             | Khammam               | 0.718                        | 0.523                     | 0.401                                  | 0.596                                               | 0.768                         | 0.751                 |
| Uttar Pradesh         | Unnao                 | 0.624                        | 0.493                     | 0.714                                  | 0.937                                               | 0.241                         | 0.753                 |
| Haryana               | Palwal                | 0.476                        | 0.559                     | 0.518                                  | 0.811                                               | 0.649                         | 0.754                 |
| Madhya Pradesh        | Anuppur               | 0.844                        | 0.183                     | 0.840                                  | 0.484                                               | 0.665                         | 0.756                 |
| Rajasthan             | Bharatpur             | 0.588                        | 0.509                     | 0.911                                  | 0.601                                               | 0.407                         | 0.756                 |
| Uttar Pradesh         | Varanasi              | 0.133                        | 0.879                     | 0.673                                  | 0.984                                               | 0.354                         | 0.759                 |
| Uttar Pradesh         | Auraiya               | 0.316                        | 0.609                     | 0.590                                  | 0.897                                               | 0.613                         | 0.761                 |
| Madhya Pradesh        | Singrauli             | 0.917                        | 0.114                     | 0.933                                  | 0.682                                               | 0.382                         | 0.762                 |
| Madhya Pradesh        | Shivpuri              | 0.829                        | 0.239                     | 0.878                                  | 0.798                                               | 0.285                         | 0.764                 |
| Uttar Pradesh         | Mathura               | 0.319                        | 0.757                     | 0.671                                  | 0.944                                               | 0.340                         | 0.765                 |
| Uttarakhand           | Udham Singh Nagar     | 0.429                        | 0.531                     | 0.315                                  | 0.808                                               | 0.964                         | 0.767                 |
| Uttar Pradesh         | Shahjahanpur          | 0.562                        | 0.407                     | 0.587                                  | 0.980                                               | 0.510                         | 0.767                 |
| Bihar                 | Patna                 | 0.363                        | 0.903                     | 0.394                                  | 0.848                                               | 0.540                         | 0.770                 |
| Uttar Pradesh         | Lalitpur              | 0.814                        | 0.243                     | 0.917                                  | 0.994                                               | 0.088                         | 0.772                 |
| Jharkhand             | Dumka                 | 0.915                        | 0.232                     | 0.876                                  | 0.898                                               | 0.135                         | 0.773                 |
| Uttar Pradesh         | Jaunpur               | 0.341                        | 0.573                     | 0.922                                  | 0.945                                               | 0.277                         | 0.775                 |
| Maharashtra           | Nagpur                | 0.227                        | 0.950                     | 0.285                                  | 0.657                                               | 0.944                         | 0.776                 |
| West Bengal           | Paschim Medinipur     | 0.498                        | 0.590                     | 0.638                                  | 0.687                                               | 0.651                         | 0.778                 |
| Rajasthan             | Baran                 | 0.864                        | 0.268                     | 0.767                                  | 0.405                                               | 0.761                         | 0.778                 |
| West Bengal           | Jalpaiguri            | 0.664                        | 0.452                     | 0.393                                  | 0.592                                               | 0.967                         | 0.781                 |
| Uttar Pradesh         | Moradabad             | 0.521                        | 0.701                     | 0.433                                  | 0.998                                               | 0.421                         | 0.782                 |
| West Bengal           | Dakshin Dinajpur      | 0.726                        | 0.540                     | 0.388                                  | 0.455                                               | 0.980                         | 0.784                 |
| Jharkhand             | Bokaro                | 0.473                        | 0.793                     | 0.634                                  | 0.909                                               | 0.280                         | 0.784                 |
| Bihar                 | Gopalganj             | 0.670                        | 0.416                     | 0.660                                  | 0.920                                               | 0.432                         | 0.787                 |
| Telangana             | Karimnagar            | 0.444                        | 0.854                     | 0.438                                  | 0.466                                               | 0.898                         | 0.789                 |
| Gujarat               | Panchmahal            | 0.770                        | 0.358                     | 0.861                                  | 0.479                                               | 0.635                         | 0.790                 |
| West Bengal           | Hugli                 | 0.368                        | 0.970                     | 0.390                                  | 0.660                                               | 0.728                         | 0.792                 |
| Odisha                | Kendujhar             | 0.856                        | 0.330                     | 0.920                                  | 0.119                                               | 0.892                         | 0.793                 |
| Nagaland              | Wokha                 | 0.789                        | 0.628                     | 0.086                                  | 0.709                                               | 0.908                         | 0.795                 |
| Jharkhand             | Pakur                 | 0.945                        | 0.136                     | 0.956                                  | 0.887                                               | 0.194                         | 0.795                 |
| Telangana             | Mahbubnagar           | 0.756                        | 0.358                     | 0.789                                  | 0.556                                               | 0.662                         | 0.798                 |
| Gujarat               | Dohad                 | 0.967                        | 0.172                     | 0.998                                  | 0.238                                               | 0.750                         | 0.800                 |
| Madhya Pradesh        | Seoni                 | 0.875                        | 0.108                     | 0.831                                  | 0.717                                               | 0.596                         | 0.801                 |
| Uttar Pradesh         | Faizabad              | 0.448                        | 0.515                     | 0.856                                  | 0.947                                               | 0.363                         | 0.803                 |
| Maharashtra           | Nanded                | 0.803                        | 0.789                     | 0.598                                  | 0.664                                               | 0.279                         | 0.804                 |
| Bihar                 | Buxar                 | 0.570                        | 0.570                     | 0.596                                  | 0.837                                               | 0.565                         | 0.806                 |
| West Bengal           | Haora                 | 0.189                        | 0.964                     | 0.404                                  | 0.651                                               | 0.931                         | 0.808                 |
| Madhya Pradesh        | Shahdol               | 0.865                        | 0.244                     | 0.822                                  | 0.549                                               | 0.662                         | 0.809                 |
| Uttar Pradesh         | Gorakhpur             | 0.372                        | 0.801                     | 0.615                                  | 0.879                                               | 0.474                         | 0.809                 |
| Maharashtra           | Buldana               | 0.548                        | 0.646                     | 0.606                                  | 0.674                                               | 0.673                         | 0.812                 |
| Madhya Pradesh        | Rewa                  | 0.698                        | 0.469                     | 0.751                                  | 0.731                                               | 0.505                         | 0.814                 |
| Jharkhand             | Dhanbad               | 0.416                        | 0.806                     | 0.746                                  | 0.953                                               | 0.235                         | 0.815                 |
| Uttar Pradesh         | Hamirpur              | 0.504                        | 0.681                     | 0.471                                  | 0.634                                               | 0.867                         | 0.817                 |
| Maharashtra           | Parbhani              | 0.490                        | 0.818                     | 0.662                                  | 0.856                                               | 0.333                         | 0.818                 |
| Bihar                 | Nawada                | 0.826                        | 0.560                     | 0.567                                  | 0.684                                               | 0.523                         | 0.820                 |
| Uttar Pradesh         | Ghazipur              | 0.485                        | 0.626                     | 0.800                                  | 0.922                                               | 0.329                         | 0.822                 |
| Madhya Pradesh        | Jabalpur              | 0.501                        | 0.659                     | 0.693                                  | 0.668                                               | 0.642                         | 0.823                 |
| Bihar                 | Kishanganj            | 0.662                        | 0.365                     | 0.687                                  | 0.956                                               | 0.498                         | 0.825                 |
| Uttar Pradesh         | Mahamaya Nagar        | 0.286                        | 0.638                     | 0.700                                  | 0.961                                               | 0.582                         | 0.826                 |
| Madhya Pradesh        | Chhatarpur            | 0.772                        | 0.294                     | 0.909                                  | 0.822                                               | 0.374                         | 0.828                 |
| Maharashtra           | Bid                   | 0.551                        | 0.731                     | 0.603                                  | 0.812                                               | 0.476                         | 0.829                 |
| Gujarat               | Vadodara              | 0.579                        | 0.894                     | 0.668                                  | 0.427                                               | 0.607                         | 0.831                 |
| Uttar Pradesh         | Kanpur Dehat          | 0.527                        | 0.551                     | 0.696                                  | 0.981                                               | 0.419                         | 0.831                 |
| Jharkhand             | Gumla                 | 0.797                        | 0.078                     | 0.836                                  | 0.618                                               | 0.848                         | 0.834                 |
| Madhya Pradesh        | Khargone (West Nimar) | 0.905                        | 0.122                     | 0.676                                  | 0.656                                               | 0.818                         | 0.834                 |



| State/Union Territory | District                     | Socio-economic vulnerability | Demographic vulnerability | Vulnerability due to housing condition | Vulnerability due to non-availability of healthcare | Epidemiological vulnerability | Overall Vulnerability |
|-----------------------|------------------------------|------------------------------|---------------------------|----------------------------------------|-----------------------------------------------------|-------------------------------|-----------------------|
| Uttar Pradesh         | Pratapgarh                   | 0.300                        | 0.430                     | 0.900                                  | 0.933                                               | 0.617                         | 0.837                 |
| Bihar                 | Jamui                        | 0.878                        | 0.211                     | 0.942                                  | 0.964                                               | 0.196                         | 0.839                 |
| Uttar Pradesh         | Maharajganj                  | 0.567                        | 0.252                     | 0.692                                  | 0.787                                               | 0.895                         | 0.840                 |
| Madhya Pradesh        | Barwani                      | 0.986                        | 0.106                     | 0.989                                  | 0.554                                               | 0.557                         | 0.840                 |
| Jharkhand             | Pashchimi Singhbhum          | 0.931                        | 0.164                     | 0.795                                  | 0.908                                               | 0.397                         | 0.844                 |
| Bihar                 | Sheikhpura                   | 0.833                        | 0.642                     | 0.714                                  | 0.523                                               | 0.488                         | 0.845                 |
| Jharkhand             | Ranchi                       | 0.440                        | 0.856                     | 0.582                                  | 0.941                                               | 0.387                         | 0.847                 |
| Uttar Pradesh         | Mirzapur                     | 0.556                        | 0.477                     | 0.967                                  | 0.989                                               | 0.219                         | 0.848                 |
| Jharkhand             | Godda                        | 0.905                        | 0.355                     | 0.939                                  | 0.991                                               | 0.020                         | 0.850                 |
| Uttar Pradesh         | Mau                          | 0.477                        | 0.770                     | 0.706                                  | 0.992                                               | 0.274                         | 0.851                 |
| Uttar Pradesh         | Muzaffarnagar                | 0.543                        | 0.635                     | 0.469                                  | 0.815                                               | 0.765                         | 0.853                 |
| Uttar Pradesh         | Bijnor                       | 0.441                        | 0.513                     | 0.488                                  | 0.966                                               | 0.822                         | 0.854                 |
| Telangana             | Adilabad                     | 0.894                        | 0.465                     | 0.775                                  | 0.311                                               | 0.789                         | 0.856                 |
| Telangana             | Warangal                     | 0.607                        | 0.803                     | 0.479                                  | 0.559                                               | 0.787                         | 0.858                 |
| Karnataka             | Gadag                        | 0.451                        | 0.756                     | 0.906                                  | 0.473                                               | 0.654                         | 0.859                 |
| Maharashtra           | Jalna                        | 0.737                        | 0.603                     | 0.743                                  | 0.768                                               | 0.388                         | 0.859                 |
| Uttar Pradesh         | Saharanpur                   | 0.549                        | 0.671                     | 0.459                                  | 0.977                                               | 0.585                         | 0.862                 |
| Bihar                 | Katihar                      | 0.687                        | 0.405                     | 0.552                                  | 0.806                                               | 0.792                         | 0.864                 |
| Uttar Pradesh         | Etawah                       | 0.285                        | 0.786                     | 0.709                                  | 0.762                                               | 0.703                         | 0.865                 |
| West Bengal           | Nadia                        | 0.469                        | 0.958                     | 0.321                                  | 0.527                                               | 0.972                         | 0.867                 |
| Uttar Pradesh         | Meerut                       | 0.296                        | 0.812                     | 0.379                                  | 0.917                                               | 0.848                         | 0.869                 |
| Madhya Pradesh        | Ujjain                       | 0.444                        | 0.534                     | 0.529                                  | 0.826                                               | 0.923                         | 0.870                 |
| Madhya Pradesh        | Mandsaur                     | 0.595                        | 0.340                     | 0.914                                  | 0.617                                               | 0.797                         | 0.872                 |
| Madhya Pradesh        | Chhindwara                   | 0.798                        | 0.214                     | 0.822                                  | 0.527                                               | 0.911                         | 0.873                 |
| West Bengal           | Birbhum                      | 0.773                        | 0.402                     | 0.717                                  | 0.521                                               | 0.865                         | 0.875                 |
| Madhya Pradesh        | Ratlam                       | 0.930                        | 0.416                     | 0.798                                  | 0.778                                               | 0.385                         | 0.876                 |
| Madhya Pradesh        | Betul                        | 0.869                        | 0.244                     | 0.840                                  | 0.659                                               | 0.696                         | 0.878                 |
| Uttar Pradesh         | Kanshiram Nagar              | 0.585                        | 0.502                     | 0.742                                  | 0.720                                               | 0.764                         | 0.879                 |
| Madhya Pradesh        | Khandwa (East Nimar)         | 0.925                        | 0.144                     | 0.731                                  | 0.756                                               | 0.762                         | 0.881                 |
| Uttar Pradesh         | Sant Ravidas Nagar (Bhadohi) | 0.466                        | 0.507                     | 0.984                                  | 0.983                                               | 0.377                         | 0.881                 |
| West Bengal           | Maldah                       | 0.757                        | 0.376                     | 0.635                                  | 0.581                                               | 0.970                         | 0.884                 |
| Bihar                 | Bhagalpur                    | 0.723                        | 0.737                     | 0.772                                  | 0.779                                               | 0.308                         | 0.886                 |
| Bihar                 | Banka                        | 0.717                        | 0.354                     | 0.959                                  | 0.865                                               | 0.432                         | 0.887                 |
| Uttar Pradesh         | Shrawasti                    | 0.750                        | 0.146                     | 0.983                                  | 0.870                                               | 0.579                         | 0.887                 |
| Bihar                 | Sitamarhi                    | 0.787                        | 0.510                     | 0.784                                  | 0.876                                               | 0.374                         | 0.890                 |
| Uttar Pradesh         | Pilibhit                     | 0.516                        | 0.321                     | 0.527                                  | 0.997                                               | 0.973                         | 0.892                 |
| Madhya Pradesh        | Tikamgarh                    | 0.768                        | 0.205                     | 0.884                                  | 0.873                                               | 0.623                         | 0.894                 |
| Uttar Pradesh         | Kaushambi                    | 0.851                        | 0.341                     | 0.977                                  | 0.995                                               | 0.192                         | 0.895                 |
| Maharashtra           | Dhule                        | 0.765                        | 0.632                     | 0.637                                  | 0.648                                               | 0.678                         | 0.897                 |
| Bihar                 | Madhubani                    | 0.812                        | 0.576                     | 0.858                                  | 0.903                                               | 0.221                         | 0.898                 |
| Uttar Pradesh         | Kannauj                      | 0.534                        | 0.565                     | 0.961                                  | 0.851                                               | 0.465                         | 0.900                 |
| West Bengal           | Puruliya                     | 0.897                        | 0.498                     | 0.970                                  | 0.590                                               | 0.423                         | 0.901                 |
| Jharkhand             | Saraikela Kharsawan          | 0.682                        | 0.460                     | 0.847                                  | 0.834                                               | 0.554                         | 0.901                 |
| West Bengal           | Uttar Dinajpur               | 0.721                        | 0.327                     | 0.607                                  | 0.787                                               | 0.950                         | 0.905                 |
| Madhya Pradesh        | Katni                        | 0.745                        | 0.311                     | 0.978                                  | 0.718                                               | 0.657                         | 0.906                 |
| Bihar                 | Araria                       | 0.759                        | 0.291                     | 0.717                                  | 0.915                                               | 0.731                         | 0.908                 |
| Madhya Pradesh        | Dewas                        | 0.745                        | 0.463                     | 0.460                                  | 0.784                                               | 0.961                         | 0.908                 |
| Madhya Pradesh        | Sidhi                        | 0.848                        | 0.097                     | 0.950                                  | 0.671                                               | 0.851                         | 0.911                 |
| Uttar Pradesh         | Fatehpur                     | 0.637                        | 0.548                     | 0.784                                  | 0.986                                               | 0.473                         | 0.912                 |
| Haryana               | Mewat                        | 0.676                        | 0.183                     | 0.804                                  | 0.912                                               | 0.851                         | 0.914                 |
| Bihar                 | Purba Champaran              | 0.776                        | 0.390                     | 0.757                                  | 0.884                                               | 0.631                         | 0.915                 |
| West Bengal           | Bardhaman                    | 0.540                        | 0.917                     | 0.504                                  | 0.621                                               | 0.858                         | 0.917                 |
| Uttar Pradesh         | Budaun                       | 0.809                        | 0.332                     | 0.775                                  | 0.923                                               | 0.626                         | 0.919                 |
| Uttar Pradesh         | Etah                         | 0.426                        | 0.433                     | 0.930                                  | 0.831                                               | 0.847                         | 0.920                 |
| Bihar                 | Begusarai                    | 0.684                        | 0.646                     | 0.812                                  | 0.845                                               | 0.485                         | 0.922                 |
| Bihar                 | Supaul                       | 0.786                        | 0.269                     | 0.859                                  | 0.919                                               | 0.646                         | 0.923                 |
| Uttar Pradesh         | Bareilly                     | 0.515                        | 0.715                     | 0.413                                  | 0.970                                               | 0.869                         | 0.925                 |
| Bihar                 | Pashchim Champaran           | 0.836                        | 0.274                     | 0.793                                  | 0.875                                               | 0.714                         | 0.926                 |
| Jharkhand             | Chatra                       | 0.919                        | 0.164                     | 0.953                                  | 0.939                                               | 0.518                         | 0.928                 |
| Bihar                 | Muzaffarpur                  | 0.626                        | 0.746                     | 0.549                                  | 0.914                                               | 0.657                         | 0.930                 |
| Madhya Pradesh        | Vidisha                      | 0.831                        | 0.210                     | 0.892                                  | 0.829                                               | 0.737                         | 0.931                 |
| Madhya Pradesh        | Panna                        | 0.867                        | 0.177                     | 0.947                                  | 0.665                                               | 0.861                         | 0.933                 |
| Uttar Pradesh         | Kheri                        | 0.834                        | 0.199                     | 0.973                                  | 0.911                                               | 0.604                         | 0.934                 |
| Rajasthan             | Sawai Madhopur               | 0.920                        | 0.526                     | 0.875                                  | 0.446                                               | 0.772                         | 0.936                 |
| Uttar Pradesh         | Gonda                        | 0.477                        | 0.305                     | 0.928                                  | 0.878                                               | 0.950                         | 0.936                 |
| West Bengal           | South 24 Parganas            | 0.668                        | 0.624                     | 0.531                                  | 0.776                                               | 0.939                         | 0.936                 |
| Jharkhand             | Garhwa                       | 0.892                        | 0.163                     | 0.820                                  | 0.934                                               | 0.731                         | 0.941                 |

| State/Union Territory | District         | Socio-economic vulnerability | Demographic vulnerability | Vulnerability due to housing condition | Vulnerability due to non-availability of healthcare | Epidemiological vulnerability | Overall Vulnerability |
|-----------------------|------------------|------------------------------|---------------------------|----------------------------------------|-----------------------------------------------------|-------------------------------|-----------------------|
| Uttar Pradesh         | Azamgarh         | 0.538                        | 0.621                     | 0.720                                  | 0.951                                               | 0.710                         | 0.942                 |
| Jharkhand             | Sahibganj        | 0.948                        | 0.310                     | 0.850                                  | 0.987                                               | 0.451                         | 0.944                 |
| Madhya Pradesh        | Damoh            | 0.850                        | 0.192                     | 0.947                                  | 0.858                                               | 0.700                         | 0.944                 |
| Uttar Pradesh         | Allahabad        | 0.357                        | 0.712                     | 0.914                                  | 0.972                                               | 0.595                         | 0.947                 |
| Madhya Pradesh        | Narsimhapur      | 0.710                        | 0.341                     | 0.906                                  | 0.635                                               | 0.958                         | 0.948                 |
| Uttar Pradesh         | Rae Bareli       | 0.585                        | 0.491                     | 0.975                                  | 0.762                                               | 0.743                         | 0.950                 |
| Bihar                 | Purnia           | 0.707                        | 0.358                     | 0.704                                  | 0.847                                               | 0.948                         | 0.951                 |
| Uttar Pradesh         | Siddharth Nagar  | 0.571                        | 0.288                     | 0.931                                  | 0.862                                               | 0.928                         | 0.953                 |
| Bihar                 | Nalanda          | 0.858                        | 0.767                     | 0.526                                  | 0.620                                               | 0.811                         | 0.953                 |
| Uttar Pradesh         | Sonbhadra        | 0.840                        | 0.158                     | 0.887                                  | 0.840                                               | 0.854                         | 0.956                 |
| Uttar Pradesh         | Aligarh          | 0.410                        | 0.793                     | 0.540                                  | 0.958                                               | 0.886                         | 0.958                 |
| Uttar Pradesh         | Ambedkar Nagar   | 0.365                        | 0.607                     | 0.707                                  | 0.975                                               | 0.934                         | 0.959                 |
| Uttar Pradesh         | Bahraich         | 0.689                        | 0.194                     | 0.962                                  | 0.931                                               | 0.812                         | 0.959                 |
| Bihar                 | Lakhisarai       | 0.718                        | 0.595                     | 0.767                                  | 0.869                                               | 0.648                         | 0.962                 |
| Jharkhand             | Palamu           | 0.886                        | 0.358                     | 0.923                                  | 0.736                                               | 0.696                         | 0.964                 |
| Madhya Pradesh        | Umaria           | 0.914                        | 0.125                     | 0.981                                  | 0.640                                               | 0.942                         | 0.966                 |
| Bihar                 | Gaya             | 0.901                        | 0.404                     | 0.803                                  | 0.978                                               | 0.541                         | 0.967                 |
| Madhya Pradesh        | Dhar             | 0.931                        | 0.186                     | 0.739                                  | 0.820                                               | 0.953                         | 0.969                 |
| Madhya Pradesh        | Satna            | 0.679                        | 0.568                     | 0.792                                  | 0.612                                               | 0.987                         | 0.970                 |
| Bihar                 | Khagaria         | 0.732                        | 0.368                     | 0.879                                  | 0.926                                               | 0.739                         | 0.972                 |
| Rajasthan             | Karauli          | 0.942                        | 0.383                     | 0.964                                  | 0.435                                               | 0.926                         | 0.973                 |
| Uttar Pradesh         | Sant Kabir Nagar | 0.656                        | 0.391                     | 0.818                                  | 0.886                                               | 0.919                         | 0.975                 |
| Uttar Pradesh         | Chitrakoot       | 0.803                        | 0.272                     | 0.997                                  | 0.892                                               | 0.726                         | 0.977                 |
| Bihar                 | Munger           | 0.513                        | 0.923                     | 0.646                                  | 0.801                                               | 0.814                         | 0.978                 |
| Uttar Pradesh         | Hardoi           | 0.793                        | 0.336                     | 0.834                                  | 0.936                                               | 0.804                         | 0.980                 |
| Uttar Pradesh         | Bara Banki       | 0.759                        | 0.311                     | 0.870                                  | 0.950                                               | 0.826                         | 0.981                 |
| Madhya Pradesh        | Alirajpur        | 0.992                        | 0.036                     | 0.989                                  | 0.743                                               | 0.959                         | 0.983                 |
| Madhya Pradesh        | Sagar            | 0.765                        | 0.344                     | 0.837                                  | 0.793                                               | 0.981                         | 0.984                 |
| Jharkhand             | Deoghar          | 0.618                        | 0.620                     | 0.937                                  | 0.959                                               | 0.615                         | 0.986                 |
| Uttar Pradesh         | Balrampur        | 0.681                        | 0.293                     | 0.890                                  | 0.967                                               | 0.928                         | 0.987                 |
| Bihar                 | Saharsa          | 0.740                        | 0.457                     | 0.917                                  | 0.867                                               | 0.793                         | 0.989                 |
| Bihar                 | Vaishali         | 0.706                        | 0.635                     | 0.681                                  | 0.790                                               | 0.977                         | 0.991                 |
| Madhya Pradesh        | Jhabua           | 0.998                        | 0.061                     | 0.995                                  | 0.798                                               | 0.978                         | 0.992                 |
| Bihar                 | Sheohar          | 0.862                        | 0.689                     | 0.781                                  | 0.823                                               | 0.759                         | 0.994                 |
| Bihar                 | Saran            | 0.603                        | 0.704                     | 0.761                                  | 0.930                                               | 0.920                         | 0.995                 |
| Bihar                 | Samastipur       | 0.820                        | 0.448                     | 0.870                                  | 0.905                                               | 0.878                         | 0.997                 |
| Uttar Pradesh         | Sitapur          | 0.806                        | 0.372                     | 0.879                                  | 0.973                                               | 0.944                         | 0.998                 |
| Bihar                 | Darbhanga        | 0.879                        | 0.588                     | 0.903                                  | 0.833                                               | 0.800                         | 1.000                 |

**Appendix Table 2: Pearson's correlation between overall vulnerability and domain-specific vulnerability (computed at the district level)**

| Domains of vulnerability                            | Correlation with overall vulnerability |
|-----------------------------------------------------|----------------------------------------|
| Socio- economic vulnerability                       | 0.41                                   |
| Demographic vulnerability                           | 0.04                                   |
| Vulnerability due to housing and hygiene condition  | 0.70                                   |
| Vulnerability due to non-availability of healthcare | 0.68                                   |
| Epidemiological vulnerability                       | 0.39                                   |
